# Supplementary material for: The impact of aerosols on photolysis frequencies and ozone production in urban Beijing during the four-year period 2012–2015
Source: Copernicus journal article supplement (doi:10.5194/acp-2019-84), 2019-03-11
Supplement: Supplementary file [file acp-2019-84-AC1-supplement.zip]

**The impact of aerosols on photolysis frequencies and ozone  
production in urban Beijing during the four-year period  
2012–2015**

Wenjie Wang<sup>1</sup>, Min Shao<sup>1,2\*</sup>, Min Hu<sup>1</sup>, Limin Zeng<sup>1</sup>, Yusheng Wu<sup>1</sup>

1 State Joint Key Laboratory of Environmental Simulation and Pollution Control,  
College of Environmental Sciences and Engineering, Peking University, Beijing  
100871, China

2 Institute for Environmental and Climate Research, Jinan University, Guangzhou  
511443, China

**\* Correspondence to:**

Prof. Min SHAO

College of Environmental Sciences and Engineering, Peking University, Beijing  
100871, China

Tel: +86-10-62757973; Fax: +86-10-62757973

Email: mshao@pku.edu.cn

## Abstract

During the period 2012-2015, the photolysis frequencies were measured at the Peking University site (PKUERS), a representative site of urban Beijing. We present a study of the effects of aerosols on two key photolysis frequencies,  $j(\text{O}^1\text{D})$  and  $j(\text{NO}_2)$ . Both  $j(\text{O}^1\text{D})$  and  $j(\text{NO}_2)$  display significant dependence on AOD (380nm) with a nonlinear negative correlation. With the increase in AOD, the slopes of photolysis frequencies vs AOD decrease, which indicates that the capacity of aerosols to reduce the actinic flux decreases with AOD. ~~In addition, the~~ The absolute values of slopes are equal to ~~4.21~~6.93 $\cdot 10^{-6} \text{ s}^{-1}$  and ~~3.20~~ $\cdot 10^{-3} \text{ s}^{-1}$  per AOD unit for  $j(\text{O}^1\text{D})$  and  $j(\text{NO}_2)$  respectively at SZA of  $60^\circ$  and AOD smaller than 0.7, both of which are larger than those observed in the Mediterranean both of which are larger than those observed in a similar, previous study in the Mediterranean. This indicates that the aerosols in urban Beijing have a stronger extinction effect on actinic flux than absorptive dust aerosols in the Mediterranean. Since the photolysis frequencies strongly depended on the AOD and the solar zenith angle (SZA), we established a parametric equation to quantitatively evaluate the effect of aerosols on photolysis frequencies in Beijing. According to the parametric equation, aerosols lead to a decrease in seasonal mean  $j(\text{NO}_2)$  by ~~24.2~~30.4% and ~~30.4~~27.3% for summer and winter, respectively, and the corresponding decrease in seasonal mean  $j(\text{O}^1\text{D})$  by ~~27.3~~32.63% respectively, compared to an aerosol-free atmosphere (AOD = 0). Based on an observation campaign in August 2012, we used the photochemical box model to simulate the ozone production rate ( $\text{P}(\text{O}_3)$ ). The simulation results shows that the monthly average

mean daytime net ozone production rate is reduced by up to 25% due to the light extinction of aerosols. Through further in-depth analysis, it was found that particulate matter concentrations maintain high level under the condition of high concentrations of ozone precursors (VOCs and NO<sub>x</sub>), which inhibits the production of ozone to a large extent. This phenomenon implies a negative feedback mechanism in the atmospheric environment of urban Beijing.

## 1. Introduction

Solar radiation plays an important role in atmospheric photochemistry, driving the photolysis of many key species. The photolysis of ozone (O<sub>3</sub>), gaseous nitrous acid (HONO), and carbonyl species, which contributes to the primary production of HO<sub>x</sub> (Volkamer et al., 2010). The photolysis of ozone produces O<sup>1</sup>D, which then reacts with H<sub>2</sub>O to form OH radicals; these radicals are the main source of OH radicals in the troposphere, as shown by reactions R1 and R2. The strong dependence of OH concentration on j(O<sup>1</sup>D) was found in a number of field measurements (Ehhalt et al., 2000; Rohrer et al., 2014; Stone et al., 2012). In addition, the photolysis of NO<sub>2</sub> produces O<sup>3</sup>P, and then O<sup>3</sup>P reacts with O<sub>2</sub> to produce O<sub>3</sub>, as shown by reactions R3 and R4, which is the only significant chemical source of ozone in the troposphere (Finlayson-Pitts et al., 2000). The photolysis frequencies of R1 and R3 are j(O<sup>1</sup>D) and j(NO<sub>2</sub>), respectively.

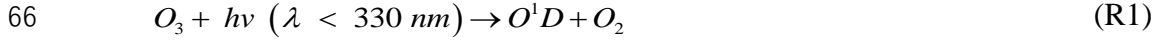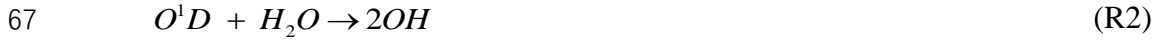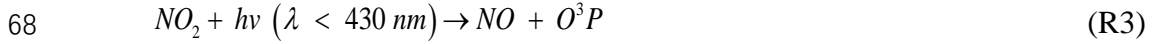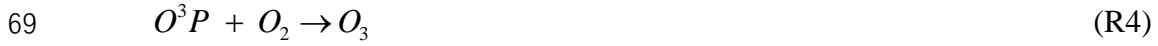

70 The photolysis frequencies are calculated by the following formula:

71 
$$j = \int_{\lambda_1}^{\lambda_2} F(\lambda) \sigma(\lambda, T) \phi(\lambda, T) d\lambda$$
 (E1)

72  $F(\lambda)$  is the actinic flux dependent on wavelength. Since the photolysis rates are  
 73 proportional to the actinic flux and not all stations acquire a  $2\pi$  spectroradiometer or  
 74 chemical actinometers for J measurements, several methods have been developed to  
 75 determine actinic flux and photolysis frequencies from ground based measurements of  
 76 irradiance (Kylling et al 2003, Kazadzis et al. 2000, 2004, Topaloglou et al. 2005,  
 77 Trebs et al. 2009).  $\sigma(\lambda, T)$  is the absorption cross section of the species that absorbs in  
 78 the wavelength range  $\lambda_1$ - $\lambda_2$ .  $\phi(\lambda, T)$  is the quantum yield of the photodissociation  
 79 reaction product.  $\lambda$ , and  $T$  represent wavelength, species and temperature,  
 80 respectively.

81 The effect of aerosols on photolysis frequencies depends on the aerosol optical  
 82 properties, SZA and altitude (Liao et al., 1999). The aerosol optical depth (AOD)  
 83 characterizes the integral of the extinction coefficient of aerosols in the vertical  
 84 direction. The light extinction of aerosols includes scattering and absorption, which  
 85 have different effects on the actinic flux. Previous studies showed that scattering  
 86 aerosols can enhance the actinic flux throughout the troposphere, while absorptive  
 87 aerosols reduce the actinic flux throughout the boundary layer (Jacobson, 1998;  
 88 Dickerson et al., 1997; Castro et al., 2001). To distinguish between these two  
 89 components, single scattering albedo (SSA) is defined as the ratio of the scattering

coefficient to the total extinction coefficient. In areas with severe aerosol pollution, aerosols can significantly affect photolysis frequencies and ozone production. Studies in Los Angeles (Jacobson, 1998), Mexico City (Castro et al., 2001; Raga et al., 2001; Li et al., 2011), São Paulo (de Miranda et al., 2005), Huston (Flynn et al., 2010), Europe (Real et al., 2011) and Russia (Pere et al., 2015) have found that aerosols reduce ozone concentration by 5-30% by attenuating photolysis frequencies. Studies in the eastern United States have shown that scattering aerosols increase ozone concentration by 5-60% by increasing the photolysis frequencies (Dickerson et al., 1997; He and Carmichael, 1999). Therefore, it is necessary to quantitatively evaluate the effect of aerosols on photolysis frequencies for a better understanding of ozone formation under highly polluted conditions.

Currently, the methods for quantitatively evaluating the influence of aerosols on photolysis frequencies mainly include radiative transfer model and parameterization method (Madronich et al., 1993). Radiative transfer model is based on an algorithm for calculating solar radiation and photolysis frequencies (Madronich et al., 1999). The observed data of related influential factors of the photolysis frequencies are taken as the model's input to calculate ~~and the photolysis frequencies simulated are compared with the observed value to test the simulation effect~~. The method comprehensively considers the influence of aerosol optical properties on the photolysis frequencies, but it does not necessarily reflect the true quantitative relationship in the atmosphere due to complicated environmental conditions and thus the simulated results don't necessarily reproduce observed values well (Lefer et al., 2003; Shetter et al., 2003; Hofzumahaus et al., 2004). For example, the simulated slope of  $j(\text{O}^1\text{D})$  vs AOD by Fast-JX algorithm within the CHIMERE model was significantly smaller than the observed slope, particularly for the high SZA values

(Mailler et al., 2016). The parameterization method is based on the observation data taken from a certain region and is used to establish the parameterized relationship between the photolysis frequencies and optical properties of aerosols (such as AOD). The method can reflect the actual atmospheric environment conditions; it also considers less influential factors and thus is easy to apply (Casasanta et al., 2011; Gerasopoulos et al., 2012). The disadvantage of this method is that the established parametric equations apply only to a specific region and cannot be extended to other regions.

With rapid economic development and urbanization in past decades, China's atmospheric pollution has become more and more severe, characterized by high concentrations of particulate matter and ozone. Satellite observations indicates that both the particulate matter and the ozone of eastern China are at higher levels compared with other locations in the globe (Verstraeten et al., 2015; Ma et al., 2014). Levels of pollution in the Beijing–Tianjin–Hebei are even more severe (Chang et al., 2009; Che et al., 2008; Zhang et al., 2014, Zhang et al., 2016). Therefore, it is necessary to study the effects of aerosols on photolysis frequencies and ozone production in the urban areas of China.

Previous model studies have shown that aerosols in China can affect ozone production by changing the photolysis ~~rate~~frequencies. Tang et al. (2004) used a sulfur transmission–emission model (STEM) to discover that ozone concentration in northeastern China was reduced by 0.1–0.8% in the sandstorm due to the change in photolysis–frequencies ~~rate~~. Tie et al. (2005) used a global aerosol–chemical model

to show that aerosols caused  $j(\text{O}^1\text{D})$  and  $j(\text{NO}_2)$  to decrease in winter by 20%-30% and 10%-30%, respectively, and in summer by 5%-20% and 1%-10%, respectively, resulting in 2%-5% and 2% reductions in ozone concentration in winter and summer, respectively. Li et al. (2011) used an air quality model to estimate the changes in the photolysis rate caused by sulfate, nitrate, ammonium, and mineral dust aerosols in the central and eastern regions of China from June 1 to June 12, 2006. This study showed that the daily average  $j(\text{O}^1\text{D})$  in the troposphere at the altitude of 1 km, 3 km, and 10 km from the ground was reduced by 53.3%, 37.2%, and 21%, respectively, resulting in a decrease in the ozone concentration by 5.4%, 3.8%, and 0.10% in the three layers. Lou et al (2014) found that with aerosols, annual mean photolysis rates,  $j(\text{O}^1\text{D})$  and  $j(\text{NO}_2)$ , were simulated to be reduced by 6-18% in polluted eastern China, leading to reductions in  $\text{O}_3$  of up to 0.5 ppbv in those regions in spring and summer by using the global chemical transport model (GEOS-Chem). However, all of these studies base their results on model simulations. Research using long-term observational data to evaluate the effects of aerosols on photolysis frequencies and ozone production in China has not yet been published.

Our overall goal is to quantitatively evaluate the effect of aerosols in urban Beijing on photolysis frequencies and thus on ozone production. First, the relationship between  $\text{PM}_{2.5}$  and AOD was investigated. Second, based on long-term observations (2012-2015) of photolysis frequencies, we discussed the impact of AOD on photolysis frequencies ( $j(\text{O}^1\text{D})$  and  $j(\text{NO}_2)$ ) in urban Beijing in detail. The relationship between AOD and photolysis frequencies is adequately compared with previous study in the Mediterranean (Casasanta et al., 2011; Gerasopoulos et al., 2012). Then, the quantitative relationship between photolysis frequencies, AOD, and SZA was

acquired by the parameterization method, which could be used to quantitatively evaluate the effect of AOD on photolysis frequencies in Beijing. Finally, a photochemistry box model was used to evaluate the effect of aerosols on ozone production.

## 2. Methodology

### 2.1. Measurement

From August 2012 to December 2015,  $j(\text{O}^1\text{D})$  and  $j(\text{NO}_2)$  were measured continuously at PKUERS site. The data of the period during October 2012 to March 2013 and August 2015 are missed due to instrument maintenance. The site (39.99°N, 116.31°E) is located on the sixth floor of a campus building at the Peking University, 20 km northwest of Tiananmen Square. The height from the ground is about 30 m. The sampling point is surrounded by classroom buildings. Concentration level and composition of air pollutants were thought to be similar to the downtown so as to be representative for the whole of Beijing (Wang et al., 2010; Xu et al., 2011; Zhang et al., 2012; Zhang et al., 2014).

The actinic flux was measured using a spectroradiometer and the photolysis frequencies were calculated from the absorption cross section and quantum yield of each species (Shetter and ~~Müller~~Muler, 1999). The spectroradiometer consisted of a single monochromator with a fixed grating (CARL ZEISS), an entrance optic with a  $2\pi$  steradian (sr) solid angle quartz diffusor and a 2048×64-pixel photodiode array detector. The spectral measurements were performed with a wavelength resolution of



2 nm, covering a wavelength range of 290-650 nm (Hofzumahaus et al., 1999). The measured spectra were corrected for dark signal and stray light. A 1000 W NIST traceable irradiance standard (Oriel) was used for calibration under laboratory conditions (Bohn et al., 2008). For  $j(\text{O}^1\text{D})$ , the quantum yields used was taken from Matsumi et al.(2002), while the ozone cross section was derived from Daumont et al. (1992) and Malicet et al. (1995). Measured temperature was used to retrieve ozone absorption cross section and quantum yield. For  $j(\text{NO}_2)$ , the quantum yields used was taken from Bass et al. (1976) and Davenport et al. (1978), while the cross section was derived from Jones and Bayes (1973), Harker et al. (1977) and Davenport (1978). The calculated photolysis frequencies had a time resolution of 10 s and an accuracy of  $\pm 10\%$  including uncertainties associated with the quartz receiver and stray-light effects (Edwards and Monks, 2003).

The optical properties of aerosols were measured by a CIMEL solar photometer (AERONET level 2 data collection, <http://aeronet.gsfc.nasa.gov/>) and the site selected ~~was-is~~ the Beijing-CAMS site (39.93°N, 116.32°E), which is ~~close to~~ 6.4km from the PKUERS site. The CIMEL solar photometer is an automatic solar-sky scanning radiometer that uses selected spectral channels. The instrumentation, data acquisition, retrieval algorithms, and calibration procedure conform to the standards of the AERONET global network and have been described in detail by Fotiadi et al. (2006). The solar extinction measurement was performed every 3 minutes in the spectral range 340–1020 nm for the calculation of AOD at wavelengths 340, 380, 440, 500, 675, 870, 970, and 1020 nm. Under cloudless conditions, the overall uncertainty of

AOD data is  $\pm 1\%$  at  $\lambda > 440$  nm and  $\pm 0.02$  at shorter wavelengths. In this study, AOD at the wavelength of 380 nm was chosen for analysis. This wavelength was selected as it is more representative of  $j(\text{NO}_2)$ . Additionally, at this wavelength we can better compare with the results of Gerasopoulos et al. (2012). The daytime clear-sky conditions were identified according to the presence of AOD data of AERONET since AOD data are unavailable under cloudy conditions. The SSA (525nm) data were derived from a field campaign undertaken in August 2012. The absorption and scattering coefficients were measured with an Aethalometer (AE-31, Magee) and a Single Wavelength Integrating Nephelometer (Aurora-1000), respectively, with a time resolution of 1 minute. Five-minute averages of ozone column concentration, SSA, and photolysis frequencies were analyzed in this study. The total ozone column was obtained by OMI (Ozone Monitoring Instrument) for the year 2012-2015, using overpass data (<http://www.temis.nl/protocols/O3global.html>) (Henk et al., 2003). In addition, meteorological parameters such as temperature, relative humidity, and pressure were simultaneously observed at the site. Table 1 presents O<sub>3</sub> column concentration, temperature, relative humidity, daytime clear-sky fraction and respective standard deviation for different seasons.

The analysis of the effects of aerosols on ozone production (Section 3.4) was based on the field campaign undertaken in August 2012. The relevant contents and methods of observation are shown in Table 12. ~~In addition, meteorological parameters such as temperature, humidity, and pressure were simultaneously observed at the site.~~ Since the time resolution of VOCs is 1 hour, all data analyzed in Section 3.4 was

processed as 1-hour average values. In this study, we focused on the effects of aerosols on photolysis frequencies and ozone production under cloudless conditions.

## 2.2 Radiative Transfer Model Description

We use the Tropospheric Ultraviolet and Visible (TUV) radiation model ([version 5.3](#)) provided by Sasha Madronich (Madronich, 1993). In order to solve the radiative transfer equation, TUV uses the discrete-ordinates algorithm (DISORT) with [4](#) streams and calculates the ~~global irradiance spectra~~ [actinic flux spectra with wavelength range of 280-420 nm in 1 nm steps and resolution. Measured temperatures were used to calculate the absorption cross sections and quantum yields.](#)

The key aerosol optical properties including AOD, SSA and AE are input into the model to test the effect of aerosols on photolysis frequencies. [AE\(380/550nm\) is taken from AERONET and the mean value of 1.3 during June 2012 - December 2015 is used in TUV model.](#)

## 2.3 Photochemical box model

The photochemical box model used in this study is based on a regional atmospheric chemical mechanism (RACM2) described by Goliff et al. (2013). The mechanism includes 17 stable inorganic compounds, 4 intermediate inorganic compounds, 55 stable organic compounds, and 43 intermediate organic compounds. Compounds not specifically treated in RACM are incorporated into species with similar functional groups. The isoprene-related mechanism used in this model is LIM mechanism proposed by Peeters et al. (2009). In this study, the observed NO<sub>2</sub>, CO,

SO<sub>2</sub>, C<sub>2</sub>–C<sub>12</sub> NMHCs, HCHO, photolysis frequencies, temperature, pressure, and relative humidity were used as constraints to simulate the concentrations of reactive radicals (RO<sub>2</sub>, HO<sub>2</sub>, and OH), intermediate species, and associated reaction rate constants. HONO wasn't measured during the period and was calculated according to the concentration of NO<sub>2</sub> and the observed ratio of HONO to NO<sub>2</sub> at an urban site in Beijing, which had a marked diurnal cycle, a maximum in the early morning (ratio values up to ~0.05–0.08 in summer) and a decrease during daytime to values around 0.01–0.02 (Hendrick et al., 2014). The model was spun up for two days once it started running in order to ensure that the simulation was stable. It was assumed that the lifetime of simulated species removed by dry deposit was 24 hours. The lifetime corresponds to the assumed deposit rate of 1.2 cm s<sup>-1</sup> and a well-mixed boundary layer height of about 1 km (Lu et al., 2012). Net ozone production is equal to the reaction rate between peroxy radicals (RO<sub>2</sub> and HO<sub>2</sub>) and NO minus the loss rate of NO<sub>2</sub> and O<sub>3</sub> as shown in E2, E3, and E4 as derived by Mihelcic et al. (2003). The ozone production rate (P(O<sub>3</sub>)), the ozone loss rate (D(O<sub>3</sub>)), and the net P(O<sub>3</sub>) were calculated from the simulation results.

$$P(O_3) = k_{HO_2+NO} [HO_2][NO] + \sum (k_{RO_2+NO}^i [RO_2^i][NO]) \quad (E2)$$

$$D(O_3) = (\theta j(O^1D) + k_{OH+O_3} [OH] + k_{HO_2+O_3} [HO_2] + \sum (k_{alkene+O_3}^j [alkene^j])) [O_3] + k_{OH+NO_2} [OH][NO_2] \quad (E3)$$

$$net P(O_3) = P(O_3) - D(O_3) \quad (E4)$$

where  $\theta$  is the fraction of  $O^1D$  from ozone photolysis that reacts with water vapor.  $i$  and  $j$  represent the number of species of  $RO_2$  and alkenes, respectively.

### 3. Results and discussion

#### 3.1 The correlation between $PM_{2.5}$ and AOD

~~In order to evaluate the extinction capacity of near surface  $PM_{2.5}$ , we investigated the relationship between  $PM_{2.5}$  and AOD (at 380nm). Compared with AOD,  $PM_{2.5}$  is a more common proxy to evaluate the level of particulate matter pollution in spite that AOD is a more closely related parameter of photolysis frequencies. As a result, we attempted to analyze the quantitative relationship between  $PM_{2.5}$  and AOD to evaluate the influence of  $PM_{2.5}$  on AOD and thus on photolysis frequencies.~~ The factors that affect this relationship include aerosol type, aerosol size distribution, aerosol distribution in the vertical direction, relative humidity (RH) and planetary boundary layer height (PBLH) (van Donkelaar et al., 2010). Figure 1 shows the correlation between AOD and  $PM_{2.5}$  in four different seasons (Spring: March, April and May; Summer: June, July and August; Autumn: September, October and November; Winter: December, January and February). The determination coefficient ( $r^2$ ) is 0.53, 0.58, 0.62 and 0.59 for spring (March, April and May), summer (June, July and August), autumn (September, October and November) and winter (December,

January and February), respectively. Meanwhile, the correlation exhibits significant seasonal differences, having relatively smaller slope (23.56) in summer and relatively larger slope (73.76) in winter. This implies that PM<sub>2.5</sub> in summer has stronger light extinction capacity than in winter. One reason for the seasonal differences is the variation in RH among different seasons (Table 21). There is higher RH in summer (57.2% on average) than in winter (30.4% on average), leading to stronger hygroscopic growth of aerosol particles, and thus resulting in higher scattering ability of aerosol particles. According to another study in urban Beijing, the higher the RH, the smaller the slope, and the higher the PBLH, the smaller the slope (Zheng, C. W et al., 2017). In addition, the slope was smaller for scattering-dominant aerosols than for absorbing-dominant aerosols, and smaller for coarse mode aerosols than for fine mode aerosols (Zheng, C. W et al., 2017). The slopes of the correlation between AOD (at 550nm) and PM<sub>2.5</sub> in this study in summer and winter are equal to 42.2 $\mu\text{g m}^{-3}$  and 119.2 $\mu\text{g m}^{-3}$ , respectively, close to that from Ma et al. (2016) (54.9 $\mu\text{g m}^{-3}$  and 110.5 $\mu\text{g m}^{-3}$ ) and Xin et al. (2016) (55.2  $\mu\text{g m}^{-3}$  and 93.4 $\mu\text{g m}^{-3}$ ), but smaller significantly than that from Zheng et al. (2017) (65~74 $\mu\text{g m}^{-3}$  and 143~158 $\mu\text{g m}^{-3}$ ). The differences mainly depend on the aerosol composition and size distribution at different observational sites in Beijing. Compared with other cities in North China (Tianjin, Shijiazhuang and Baoding) (Ma et al., 2016), the slope in Beijing for winter is significantly higher, ~~indicating that the extinction capacity of aerosols in Beijing is weaker in winter.~~ Consequently, using PM<sub>2.5</sub> to estimate AOD has a large uncertainty due to multiple interference factors.

### 3.2 Seasonal and diurnal variability of AOD and photolysis frequencies

The diurnal cycles of AOD is shown in Figure 2. AOD displays obvious diurnal variation, with relatively high level at noon and low level at dawn and evening. The diurnal variation of  $PM_{2.5}$  is ~~opposite significantly different from~~ to AOD. ~~The opposite diurnal variation of AOD and  $PM_{2.5}$  is mainly due to higher development of planetary boundary layer at noon, resulting in more complete mixture of particulate matter in the vertical direction.~~ In addition, AOD has obvious seasonal differences, with the highest AOD in summer and the lowest AOD in winter. Conversely,  $PM_{2.5}$  in winter (~~66.942~~ $\mu g m^{-3}$ ) is significantly higher than in summer (~~45.535~~ $\mu g m^{-3}$ ). In spite of lower  $PM_{2.5}$  in summer, AOD in summer is higher due to stronger extinction capacity of  $PM_{2.5}$  as discussed in 3.1. Figure 3 shows the diurnal variation of the photolysis frequencies under cloudless conditions for each season.  $j(O^1D)$  and  $j(NO_2)$  are both highest in summer, followed by spring and autumn, and lowest in winter. This seasonal difference is mainly determined by the difference in SZA for the four seasons.

The observed mean daily maxima of photolysis frequencies at this site are lower than that observed in the eastern Mediterranean (Crete, Greece,  $35^{\circ}20'N, 25^{\circ}40'E$ ) (Gerasopoulos et al., 2012) by  $7.8 \times 10^{-6} \pm 5.5 \times 10^{-6} s^{-1}$  and  $4.9 \times 10^{-6} \pm 1.8 \times 10^{-6} s^{-1}$  for  $j(O^1D)$ , and  $1.9 \times 10^{-3} \pm 1.2 \times 10^{-3} s^{-1}$  and  $3.3 \times 10^{-3} \pm 1.0 \times 10^{-3} s^{-1}$  for  $j(NO_2)$ , in summer and winter respectively. The corresponding lower photolysis frequencies of

Beijing than the eastern Mediterranean due to SZA difference is  $1.7 \times 10^{-6} \text{ s}^{-1}$  and  $3.0 \times 10^{-6} \text{ s}^{-1}$  for  $j(\text{O}^1\text{D})$ , and  $8.0 \times 10^{-5} \text{ s}^{-1}$  and  $6.6 \times 10^{-4} \text{ s}^{-1}$  for  $j(\text{NO}_2)$  according to TUV model under aerosol-free conditions, which are significantly lower than observed decreased magnitudes. Additionally, we know that the temperature is lower in Beijing during the winter compared to conditions in Crete. The measured mean temperature in Beijing during winter is equal to  $0.53 \pm 4.2 \text{ }^\circ\text{C}$  (Table 1). When we consider the temperature in Crete is  $10 \text{ }^\circ\text{C}$  higher than in Beijing, the lower  $j(\text{O}^1\text{D})$  of Beijing than Crete is  $5.5 \times 10^{-7} \text{ s}^{-1}$ , which is also not able to compensate the  $j(\text{O}^1\text{D})$  gap between the two sites during winter. Taking into account the similar levels of ozone column concentration in the two sites, the large gap of photolysis frequencies in the two sites is mainly attributed to the higher AOD in Beijing ( $0.76 \pm 0.75$ ) than in the eastern Mediterranean ( $0.27 \pm 0.13$ ).

It can be seen from Figure 3 that the difference between winter and summer for  $j(\text{O}^1\text{D})$  is significantly larger than that for  $j(\text{NO}_2)$ , where the summer midday averages of  $j(\text{O}^1\text{D})$  and  $j(\text{NO}_2)$  are 5 times and 2 times those of winter, respectively. There are two reasons for this phenomenon. One, compared with  $j(\text{NO}_2)$ ,  $j(\text{O}^1\text{D})$  is more sensitive to the change in SZA and the same change in SZA results in a larger change in  $j(\text{O}^1\text{D})$  than  $j(\text{NO}_2)$ . Two, the main influential factors of  $j(\text{NO}_2)$  under cloudless conditions are SZA and AOD, and the influence of ozone column concentration and temperature on  $j(\text{NO}_2)$  is negligible. However,  $j(\text{O}^1\text{D})$  is affected significantly by the ozone column concentration and temperature, in addition to SZA and AOD. The



higher ozone column concentration and lower temperature in winter than in summer lead to the difference in  $j(\text{O}^1\text{D})$  further increasing (Table 21).

### 3.3 The correlation between photolysis frequencies and AOD

#### 3.3.1 The correlation between $j(\text{O}^1\text{D})$ and AOD

In order to rule out the effect of SZA on photolysis frequencies, we chose SZA equal to  $30^\circ$  and  $60^\circ (\pm 1^\circ)$  for analysis. Figure 4 presents the dependence of  $j(\text{O}^1\text{D})$  on AOD at different levels of ozone column concentration at SZA of  $30^\circ$  and  $60^\circ (\pm 1^\circ)$ . The ozone column concentration has a classification width of 30 DU. This relatively large classification width is chosen to make sure that there are enough points to fit the relationship between  $j(\text{O}^1\text{D})$  and AOD.  $j(\text{O}^1\text{D})$  exhibits a clear dependence on AOD, with a nonlinear negative correlation. The scatter of these points is mainly due to variations in ozone column and temperature. As AOD increased, the slope of  $j(\text{O}^1\text{D})$ -AOD gradually decreases, indicating that the ability of aerosols to reduce  $j(\text{O}^1\text{D})$  gradually decreases with AOD. This result differs from that found in Mediterranean, where  $j(\text{O}^1\text{D})$  was linearly negatively correlated with AOD (Casasanta et al., 2011; Gerasopoulos., 2012). A larger variation range of AOD in Beijing (0-3) compared with Mediterranean (0-0.6) is one reason for the difference.

For further analysis, the observed relation between  $j(\text{O}^1\text{D})$  and AOD was compared with TUV-simulated results. Panels a and b of Figure 5 present the

comparison between observed and TUV-simulated  $j(O^1D)$  against AOD at a SZA of 30° and 60° respectively and ozone column concentration of 330-360 DU. The observed  $j(O^1D)$  is at temperature of 288-308K and ozone column of 330-360DU.  $AE(380/550nm) = 1.3$ , ozone column = 345 and Temperature = 298K are used in TUV model for all simulations. Mean Earth-Sun distance was used in the calculations of TUV model and measured  $j$ -values were scaled to the mean Earth-Sun distance. At low AOD level ( $< 0.8$ ), the observed slope of  $j(O^1D)$  vs AOD is significantly larger than the simulated slope at SSA of 0.95, and slightly larger than the simulated slope at SSA of 0.85. With AOD increasing, the observed slope decreases rapidly to the level smaller than the simulated slopes. The rapid change of the slope with AOD can be related to the variation of SSA at different AOD level. Figure 6 presents the relationship between SSA and AOD based on observed data in August 2012. The result suggests a significant correlation between SSA and AOD. With the increase in AOD, SSA is elevated; meanwhile, the slope of SSA vs AOD is gradually reduced. Similar results have been obtained by Bais et al., 2005, Krotkov et al., 2005 and Kazadzis et al., 2012). SSA characterizes the ratio of the scattering extinction coefficient to the total extinction coefficient (scattering extinction coefficient plus absorptive extinction coefficient) of aerosols. The smaller the SSA, the higher the absorptive component and lower the scattering component of the aerosol, and the stronger the ability of the aerosol to reduce the actinic flux (Dickerson et al., 1997). Figure 6 indicates that aerosols in Beijing under low AOD conditions had a higher proportion of absorptive aerosol components than under high AOD conditions, and, as

a result, had a stronger ability to reduce the photolysis frequencies, which contributed to the rapidly reduced slope of  $j(\text{O}^1\text{D})$  vs AOD with AOD. However, due to absence of more SSA data of the period 2012-2015, we can't give more sufficient evidence for the dependence of SSA on AOD. For another perspective, Owing to the biomass burning and soot emission generated from heating, the fine mode heavily-absorbing aerosol percentage is higher in winter than in summer (Zheng et al., 2017; Liu et al., 2016; Zhang et al., 2013), and thus aerosols in winter have stronger ability to reduce the photolysis frequencies. High AOD levels often appeared in summer and low AOD levels occurred mostly in winter (Figure 2), another fact that may also explains the rapidly reduced slope of  $j(\text{O}^1\text{D})$  vs AOD with AOD.

Comparing panels a and b of Figure 4, we see that at AOD smaller than 1, the slope of  $j(\text{O}^1\text{D})$  vs AOD exhibits a significant dependence on SZA and the slope at  $30^\circ$  of SZA is about 1.5-2.0 times larger than that at  $60^\circ$  of SZA. This result is similar to that of the observations made in the central Mediterranean (Casasanta et al., 2011). For the purpose of comparison with the study in the Mediterranean, the slope of  $j(\text{O}^1\text{D})$  vs AOD was calculated at AOD smaller than 0.7.

Table 3 presents slope, intercept and the determination coefficient ( $r^2$ ) of linear fits of correlation between  $j(\text{O}^1\text{D})$  and AOD for each ozone column class at AOD smaller than 0.7. At SZA of  $60^\circ$  and  $\text{O}_3$  column concentration of 300-330 DU, the respective slope of the linear regression indicates a reduction of  $j(\text{O}^1\text{D})$  by  $4.24 \cdot 10^{-6} \text{ s}^{-1}$  per AOD unit. Gerasopoulos et al. (2012) reported that the observed slope in the eastern Mediterranean was equal to  $2.44 \cdot 10^{-6} \text{ s}^{-1}$  at  $\text{O}_3$  column of 300-320 DU.

Casasanta et al. (2011) reported that the observed slope in the central Mediterranean varied from  $2.667 \cdot 10^{-6} \text{ s}^{-1}$  to  $3.879 \cdot 10^{-6}$  at  $\text{O}_3$  column of 300-330 DU. All of these results are smaller than the value of the present study, indicating that aerosols in urban Beijing had a stronger extinction capacity on  $j(\text{O}^1\text{D})$  than those in the Mediterranean that was influenced by both natural absorptive aerosols and anthropogenic aerosols. Previous study indicated that SSA in Beijing ranged from 0.80 to 0.86 (Garland et al., 2009; Han et al., 2015b; Han et al., 2017; Tian et al., 2015). The relatively low SSA in Beijing could be an important reason for the stronger extinction capacity.

### 3.3.2 The correlation between $j(\text{NO}_2)$ and AOD

Unlike  $j(\text{O}^1\text{D})$ ,  $j(\text{NO}_2)$  is negligibly affected by ozone column concentration and depends mainly on AOD and SZA under cloudless conditions. Figure 7 presents the dependence of  $j(\text{NO}_2)$  on AOD at different SZA levels under cloudless conditions.

The cosine of SZA ( $\cos(\text{SZA})$ ) is categorized according to a width of 0.2. In the same category of  $\cos(\text{SZA})$ ,  $j(\text{NO}_2)$  displays a strong dependence on AOD. The scatter of these points is due to the relatively large classification width of SZA to a large extent.

When  $\cos(\text{SZA})$  is at its maximum level (0.8-1), the correlation between  $j(\text{NO}_2)$  and AOD is close to linear. When  $\cos(\text{SZA})$  decreases, the correlation tends to be nonlinear. Similar to  $j(\text{O}^1\text{D})$ , the observed slopes of  $j(\text{NO}_2)$  vs AOD are also larger than TUV-simulated slope at SSA of 0.95 and 0.85 when AOD is smaller than 0.8,

and decreased rapidly with increasing AOD (panels c and d of Figure 5). The reason for this result is the same with that for  $j(\text{O}^1\text{D})$  as explained above.

Table 4 presents the slope, intercept and the determination coefficient ( $r^2$ ) of linear fits of correlation between  $j(\text{NO}_2)$  and AOD for each ozone column class at AOD smaller than 0.7. The slope of  $j(\text{NO}_2)$  vs AOD also displays a significant dependence on  $\cos(\text{SZA})$ . The slope increases as  $\cos(\text{SZA})$  increases from 0 to 0.5 and then decreases as  $\cos(\text{SZA})$  increases from 0.5 to 1. At SZA of  $60^\circ \pm 1$  ( $\cos(\text{SZA})=0.5 \pm 0.015$ ), the respective slope of the linear regression indicates a reduction of  $j(\text{NO}_2)$  by  $3.2 \cdot 10^{-3} \text{ s}^{-1}$  per AOD unit. This result is larger than the value for non-dust aerosols ( $2.2 \cdot 10^{-3} \text{ s}^{-1}$ ) and close to the value for dust aerosols ( $3.1 \cdot 10^{-3} \text{ s}^{-1}$ ) in the eastern Mediterranean reported by Gerasopoulos et al. (2012).

### 3.4 The parameterization relationship between photolysis frequencies, AOD, and SZA

As analyzed above, the photolysis frequencies ( $j(\text{O}^1\text{D})$  and  $j(\text{NO}_2)$ ) strongly depended on AOD and  $\cos(\text{SZA})$  and could be fit into expression E5 using a quadratic polynomial form. The fitting parametric equations for  $j(\text{NO}_2)$  is shown in Table 5. For  $j(\text{O}^1\text{D})$ , both of  $\text{O}_3$  column and temperature affect  $j(\text{O}^1\text{D})$  significantly. Figure S1 presents the dependence of  $j(\text{O}^1\text{D})$  on ozone column at low AOD level ( $\text{AOD} < 0.3$ ) and SZA of (a)  $30^\circ \pm 1^\circ$  and (b)  $60^\circ \pm 1^\circ$ , respectively. Ozone column ranging from 270

to 400 DU leads to  $j(O^1D)$  reducing about 50%. In order to evaluate the impact of temperature on  $j(O^1D)$ , we calculated the ratio of  $j(O^1D)$  at measured temperature to  $j(O^1D)$  at temperature = 298K ( $j(O^1D)/j(O^1D)_{T=298K}$ ) (Figure S2).  $j(O^1D)/j(O^1D)_{T=298K}$  varied from 0.82 to 1.03 indicating that temperature changed  $j(O^1D)$  by no more than 21%. Therefore, temperature played a minor role in changing  $j(O^1D)$  compared with ozone column. As a result, when we fitted the relationship among  $j(O^1D)$ , AOD and  $\cos(SZA)$ , the effect of ozone column is considered but temperature is not considered. By fitting the relationship at different ozone classes (classification width=30DU), we found that ozone column increasing by 30DU results in  $j(O^1D)$  at a constant SZA and AOD decreasing by 18%. Therefore, the parametric equation for  $j(O^1D)$  is transformed into the form E6, which reflects the influence of ozone column. The parameters  $a_1$ - $a_5$  correspond to ozone column range = 300-330 DU, thus we use 315 DU as the weighted standard of ozone column.

$$j = a_1 + a_2 AOD + a_3 \cos(SZA) + a_4 (AOD)^2 + a_5 AOD \cos(SZA) + a_6 (\cos(SZA))^2 \quad \text{... E5}$$

$$j = [a_1 + a_2 AOD + a_3 \cos(SZA) + a_4 (AOD)^2 + a_5 AOD \cos(SZA) + a_6 (\cos(SZA))^2] \times [1 + (315 - O_3 \text{ column}) \times 0.006] \quad \text{E6}$$

Table 5 and Table 6 presents the fitting parametric equations and the corresponding coefficients of determination ( $R^2$ ) at different  $O_3$  column ranges. The coefficients of determination of the fitting equations are greater than 0.95 for  $j(NO_2)$  and  $j(O^1D)$  at a certain  $O_3$  column, indicating that both of the photolysis frequencies strongly depended on AOD and  $\cos(SZA)$  at a certain  $O_3$  column, and the effect of other factors such as SSA and AE are integrated into the constant term in the

parametric equation. Since the ozone column concentration has greater influence on  $j(\text{O}^1\text{D})$  than on  $j(\text{NO}_2)$ , the parameters of fitting equations for  $j(\text{NO}_2)$  are similar, but the parameters of fitting equations for  $j(\text{O}^1\text{D})$  have a large fluctuation at different  $\text{O}_3$  column ranges (especially  $a_1$  and  $a_2$ ). The parametric equations can be used to quantitatively evaluate the effect of AOD on photolysis frequencies in Beijing.

According to the parametric equations, aerosols lead to a decrease in seasonal mean  $j(\text{NO}_2)$  by 24.2% and 30.4% and a decrease in seasonal mean  $j(\text{O}^1\text{D})$  by 27.3% and 32.63% in summer and winter under clear-sky conditions, respectively, compared to an aerosol-free atmosphere. The decreasing ratio of the photolysis frequencies in winter is higher than in summer mainly due to the higher SZA ~~and lower SSA~~ in winter.

The effect of aerosols on photolysis frequencies in Beijing is compared with other studies. Real and Sartelet (2011) reported a reduction in  $j(\text{NO}_2)$  and  $j(\text{O}^1\text{D})$  of 13%-14% due to aerosols by using the radiative transfer code Fast-J during summer 2001 over European regions. Flynn et al (2010) reported that aerosols reduced  $j(\text{NO}_2)$  by 3% in Huston during 2006 by using TUV model. Gerasopoulos et al (2012) reported that aerosols reduced  $j(\text{NO}_2)$  and  $j(\text{O}^1\text{D})$  by 5%-15% with 5-yr mean AOD at 380nm equal to 0.27. All of these results are lower than the reduction ratio of this study mainly due to higher aerosol level in Beijing (4-yr mean AOD equal to  $0.76 \pm 0.75$ ). Hodzic et al. (2007) simulated a 15–30%  $j(\text{NO}_2)$  photolysis reduction during the 2003 European summer heatwave in the case of absorbing biomass burning

aerosols with AOD at 550 nm equal to 0.7-0.8 and SSA at 532 nm equal to 0.83-0.87.

The result of [Hodzic et al. \(2007\)](#) is comparable with the reduction ratio of

this study possibly due to the equivalent levels of AOD and SSA. In addition, Péré et

al (2015) simulated a higher reduction (20–50%) in  $j(\text{NO}_2)$  and  $j(\text{O}^1\text{D})$  along the

transport of the aerosol plume during the 2010 Russian summer wildfires episode.

The higher reduction is due to the higher level of AOD (peak value of AOD at 400nm

reached 2-4), even though SSA is very high (0.97).

$$j = a_1 + a_2 \text{AOD} + a_3 \cos(\text{SZA}) + a_4 (\text{AOD})^2 + a_5 \text{AOD} \cos(\text{SZA}) + a_6 (\cos(\text{SZA}))^2 \quad \text{---E5}$$

~~The above established parametric relationship of  $\text{PM}_{2.5}$ -AOD and  $j(\text{NO}_2)$ -AOD-SZA gives us a chance to estimate the effect of  $\text{PM}_{2.5}$  on photolysis frequencies due to aerosol light extinction.~~

### 3.5 The influence of AOD on ozone production

In order to explain the effect of aerosol light extinction on ozone production, we used the data from the field observation campaign undertaken in August 2012. Ozone production depends on its precursors ( $\text{NO}_x$  and VOCs), meteorological factors, and solar radiation. Solar radiation is the driving force for tropospheric photochemical reactions, in which  $j(\text{O}^1\text{D})$  and  $j(\text{NO}_2)$  are both important for ozone production. On the one hand, the increase in  $j(\text{NO}_2)$  promotes the photolysis of  $\text{NO}_2$ , thereby accelerating the formation of ozone. On the other hand, the increase in  $j(\text{O}^1\text{D})$



accelerates the photolysis of ozone. In addition, the increase in the photolysis frequencies will accelerate the photolysis of OVOC (especially formaldehyde and acetaldehyde), HONO, and H<sub>2</sub>O<sub>2</sub>, resulting in increases in OH and HO<sub>2</sub>, which will promote the reaction between OH and VOCs and thus produce more RO<sub>2</sub>. As a result, more ozone is produced by increasing the reaction rate between RO<sub>2</sub> (or HO<sub>2</sub>) and NO. However, the increase in OH and HO<sub>2</sub> also consumes ozone and NO<sub>2</sub>, which contributes to the increase in D(O<sub>3</sub>). In brief, the overall effect of changes in photolysis frequencies on sources and sinks of ozone determines the change in the net ozone production rate.

Ozone production (HO<sub>2</sub> + NO, RO<sub>2</sub> + NO), ozone loss (O<sup>1</sup>D + H<sub>2</sub>O, HO<sub>2</sub> + O<sub>3</sub>, O<sub>3</sub> + OH, NO<sub>2</sub> + OH, and O<sub>3</sub> + alkenes), and net ozone production rate during August 2012 were calculated by using the box model. We used the observed photolysis frequencies (i.e. j<sub>obs</sub>) and the calculated photolysis frequencies by parametric equation under the condition of AOD equal to 0 (i.e. j<sub>AOD=0</sub>), were used to constrain the box model. The difference of simulated results in the two scenarios can be attributed to the effect of aerosol light extinction. As a result, the presence of aerosols causes a decrease in both ozone production rate and loss rate, as is shown in Figure 8. Since the decreasing amplitude of the ozone production rate is far larger than that of the ozone loss rate, the net production rate of ozone is reduced by 25%. This reduction is comparable with the results of the study in Mexico City, where aerosols caused a 20% reduction in the ozone concentrations (Castro et al., 2001). Studies in Houston and Crete have shown that aerosols cause ozone production rates

to decrease by about 4% and 12%, respectively, which are lower than that found in this study (Flynn et al., 2010; Gerasopoulos et al., 2012).

The ratio of the observed photolysis frequencies to the photolysis frequencies at AOD equal to 0 is defined as JIF (Flynn et al., 2010). A JIF of less than 1 indicates that the aerosols cause a decrease in the photolysis frequencies. Figure 9 shows the relation between  $P(O_3)_{j\_obs}/P(O_3)_{j\_AOD=0}$  (or  $D(O_3)_{j\_obs}/D(O_3)_{j\_AOD=0}$ ) and JIF. The majority of JIF values were less than 1, with an average of 0.72, indicating that aerosols greatly attenuated photolysis frequencies due to high levels of AOD (average of 1.07) and low levels of SSA (average of 0.84) during the observation period.  $P(O_3)_{j\_obs}/P(O_3)_{j\_AOD=0}$  and  $D(O_3)_{j\_obs}/D(O_3)_{j\_AOD=0}$  are both linearly positively correlated with JIF and the scatters are mostly above the 1:1 line. As can be seen from the figure 9, a 30% reduction in photolysis frequencies ( $JIF = 0.7$ ) due to the presence of aerosols results in a decrease in ozone production rate and loss rate by about 26% and 15%, respectively. The decreasing amplitude in the ozone production rate is greater than the decrease in the ozone loss rate because the corresponding processes of ozone production are all light-driven, but the corresponding processes of ozone loss are not all light-driven because the reaction of  $O_3$  with alkenes does not depend on solar radiation. According to the simulated results, the reaction of ozone with alkenes during this campaign accounts for 17% of total ozone loss.

The diurnal profile of the mean ozone production and loss rate is shown in Figure 10.  $P(O_3)$  peak midday in the 12:00-14:00 local hours at 31 ppb/h without aerosol impact and 23 ppb/h with aerosol impact. The maximum  $D(O_3)$  also occurs

between 12:00 and 14:00 at 4.2 ppb/h without aerosol impact and 3.5 ppb/h with aerosol impact. There is little difference between aerosol-impact and aerosol-free  $P(O_3)$  (or  $D(O_3)$ ) in the hours of 6:00-11:00, but the difference in the afternoon (12:00-18:00) is large, indicating that the reduction effect of aerosol on ozone production mainly occurs during the afternoon.

The above analysis focuses on the effect of aerosol on the ozone production due to aerosol light extinction. However, it does not consider the close relationship between aerosol and ozone's gaseous precursors in the actual atmosphere. To explain this problem, we chose two adjacent days (small SZA effect) with obviously different AOD levels: a clean day (A day: August 21, 2012; AOD = 0.21,  $PM_{2.5}$ =21.6  $\mu g m^{-3}$ ) and a day with high aerosol pollution (B day; August 26, 2012; AOD = 3.2,  $PM_{2.5}$ =125.0  $\mu g m^{-3}$ ) (Table 7). The difference in AOD between the two days can be taken to represent the maximum daytime gap of AOD for this month. The ozone column concentrations for these two days were 302 DU and 301 DU, respectively, of which the effect on  $j(O^1D)$  is negligible. Under these conditions, the  $j(O^1D)$  value at noon time decreases from  $3.23 \times 10^5 s^{-1}$  on A day to  $1.29 \times 10^5 s^{-1}$  on B day (i.e., a 60% reduction) and the  $j(NO_2)$  value at noon time decreases from  $8.26 \times 10^{-3} s^{-1}$  on A day to  $4.19 \times 10^{-3} s^{-1}$  on B day (i.e., a 49.2% reduction). As shown in Table 7, B day has higher AOD and higher concentrations of gaseous pollutants. The concentrations of CO, NO<sub>2</sub>, HCHO and the OH reactivity of VOCs in B day are much higher than in A day, with the ratio of 3.6, 2.3, and 2.0, respectively. The simultaneous increases of gaseous pollutants and AOD are due to the fact that gaseous pollutants (NO<sub>x</sub>, SO<sub>2</sub>,

and VOCs) emitted by major pollution sources in Beijing, including traffic and industry, have undergone the processes of gas-phase oxidation and nucleation to generate secondary particulate matter that contributes to aerosol light extinction. Previous studies have reported that secondary particulate matter has accounted for more than 60% of total particulate matter during severe smog pollution in Beijing summers (Han et al., 2015a; Guo et al., 2014). In addition, several studies have shown that secondary components in particulate matter (especially secondary organics and ammonium sulfate) have dominated the aerosol light extinction (Han et al., 2014; Han et al., 2017; Wang et al., 2015). Observations made in Beijing during the summer of 2006 showed that ammonium sulfate and ammonium nitrate contributed 44.6% and 22.3%, respectively, to the total extinction coefficient during a severe period of smog (Han et al., 2014); in the summer of 2014 in Beijing, ammonium sulfate, secondary organic aerosols, and ammonium nitrate contributed 30%, 22%, and 18%, respectively, to the total extinction coefficient (Han et al., 2017).

As shown in Figure 11, the simulation results indicate that the net  $P(O_3)$  of B day is 36.2% higher than that of A day due to higher concentrations of ozone precursors on B day. This result is consistent with the observed ozone concentrations, of which the observed ozone concentration in B day is 2.2 times higher than that of A day. If we adjust the photolysis frequencies level of B day to the level of A day, the net  $P(O_3)$  increases by 70.0%, which indicates that the high level of particulate matter in B day greatly inhibits ozone production. This result means that the system is under negative feedback, thus keeping  $O_3$  at a relatively stable level. Table 8 summarizes the average

levels of gaseous pollutants and photolysis frequencies for AOD less than 1 and greater than 1, as measured during August 2012. It shows that, the concentrations of ozone's precursors are higher and the photolysis frequencies are lower at high AOD levels ( $\text{AOD} > 1$ ) than those at low AOD level ( $\text{AOD} < 1$ ). This result means that the negative feedback mechanism is prevalent throughout the whole campaign period. Therefore, the prevention and control measures of air pollution in Beijing need to incorporate this coupling mechanism between particulate matter and ozone to achieve effective control of these two main pollutants.

#### 4. Conclusion

Photolysis reactions are important driving forces for tropospheric photochemical oxidation processes and ozone production. In this study, we explored in detail the effects of aerosols on photolysis frequencies and ozone production in Beijing, based on a long observation period of 4 years. We have found that:

(1) There is a strong correlation between  $\text{PM}_{2.5}$  and AOD, and the slope in summer is smaller significantly than in winter, which indicates that aerosols in summer have a more efficient extinction capacity than in winter.

(2) As AOD increased, the extinction effect of aerosol on photolysis frequencies was decreased; this result was probably related to a higher proportion of scattering aerosols under high AOD conditions than under low AOD conditions. The slope of the correlation between photolysis frequencies and

AOD indicates that the aerosols in urban Beijing have a stronger extinction on actinic flux than absorptive dust aerosols in the Mediterranean.

(3) The influence of AOD on photolysis frequencies was evaluated quantitatively by establishing parametric equations. According to the parametric equation, aerosols lead to a decrease in seasonal mean  $j(\text{NO}_2)$  by 24.2% and 30.4% for summer and winter, respectively, and the corresponding decrease in seasonal mean  $j(\text{O}^1\text{D})$  by 27.3% and 32.63% respectively, compared to an aerosol-free atmosphere.

(4) In order to evaluate the effects of aerosols on ozone production rate, we carried out an observation campaign in August ~~2014~~2012. The results show that aerosols reduced the net ozone production rate by 25% by reducing the photolysis frequencies. High concentrations of ozone gaseous precursors were often accompanied by high concentrations of particulate matter, which, to a large extent, inhibited excessive levels of ozone generation and reflected the negative feedback effect of the atmospheric system. Therefore, the influence of aerosol on photolysis frequencies and thus on the rate of oxidation of VOCs and NO<sub>x</sub> to ozone and secondary aerosol is important for determining the atmospheric effects of controlling the precursor emissions of these two important air pollutants (aerosols and ozone).

## Author contribution

| Author      | Contribution                                                                                                 |
|-------------|--------------------------------------------------------------------------------------------------------------|
| Wenjie Wang | acquisition of data; analysis and interpretation of data;<br>drafting the article and revising it critically |
| Min Shao    | substantial contributions to conception and design; revising<br>the article critically                       |
| Min Hu      | collection of data                                                                                           |
| Limin Zeng  | collection of data                                                                                           |
| Yusheng Wu  | collection of data                                                                                           |

## ACKNOWLEDGEMENTS

This work was supported by the Major Program of the National Natural Science Foundation of China [Grant number 91644222]. We thank Hongbin Chen and Philippe Goloub for data management of AOD and other aerosol optical properties on AERONET.

## Reference

- Barnarda, J. C., Chapman E. G., Fasta, J. D., Schmelzera, J. R., Slusserb, J. R., Shetterc, R. E.: An evaluation of the FAST-Jphotolysis algorithm for predicting nitrogen dioxide photolysis rates under clear and cloudy sky conditions, *ATMOSPHERIC ENVIRONMENT*, 38, 3393-3403, 10.1016/j.atmosenv.2004.03.034, 2004.
- Bais, A. F., Kazantzidis, A., Kazadzis, S., Balis, D. S., Zerefos, C. S., Meleti, C. Deriving an effective aerosol single scattering albedo from spectral surface UV irradiance measurements, *ATMOSPHERIC ENVIRONMENT*, 39, 1093-1102, DOI: 10.1016/j.atmosenv.2004.09.080, 2005.
- Bass, A. M., Ledford, A. E., and Laufer, A. H., Extinction coefficients of NO<sub>2</sub> and N<sub>2</sub>O<sub>4</sub>, *J. Res. Nat. Bureau Standards*, 80A, 143-162, 1976.
- Bohn, B., Corlett, G. K., Gillmann, M., Sanghavi, S., Stange, G., Tensing, E., Vrekoussis, M., Bloss, W. J., Clapp, L. J., Kortner, M., Dorn, H. P., Monks, P. S., Platt, U., Plass-Dulmer, C., Mihalopoulos, N., Heard, D. E., Clemitshaw, K. C., Meixner, F. X., Prevot, A. S. H., Schmitt, R.: Photolysis frequency measurement techniques: Results of a comparison within the ACCENT project,



ATMOSPHERIC CHEMISTRY AND PHYSICS, 8, 5373–5391,  
doi:10.5194/acp-8-5373-2008, 2008.

Casasanta, G., di Sarra, A., Meloni, D., Monteleone, F., Pace, G., Piacentino, S.,  
Sferlazzo, D.: Large aerosol effects on ozone photolysis in the Mediterranean,  
ATMOSPHERIC ENVIRONMENT, 45, 3937–3943,  
10.1016/j.atmosenv.2011.04.065, 2011.

Castro, T., Madronich, S., Rivale, S., Muhlia, A., Mar, B.: The influence of aerosols  
on photochemical smog in Mexico City, ATMOSPHERIC ENVIRONMENT, 35,  
1765–1772, 10.1016/S1352-2310(00)00449-0, 2001.

Chang, D, Song, Y, Liu, B.: Visibility trends in six megacities in China 1973–2007,  
ATMOSPHERIC RESEARCH, 94, 161–167, 10.1016/j.atmosres.2009.05.006,  
2009.

Che, H., Zhang, X., Li, Y., Zhou, Z., Qu, J. J., Hao, X.: Haze trends over the capital  
cities of 31 provinces in China, 1981–2005, THEORETICAL AND APPLIED  
CLIMATOLOGY, 97, 235–242, 10.1007/s00704-008-0059-8, 2009.

de Miranda, R., Andrade, M. F., Fattori, A. P.: Preliminary studies of the effect of  
aerosols on nitrogen dioxide photolysis rates in the city of Sao Paulo, Brazil.  
ATMOSPHERIC RESEARCH, 75, 135–148, 10.1016/j.atmosres.2004.12.004,  
2005.

Daumont, D., Brion, J., Charbonnier, J., Malicet, J. Ozone UV spectroscopy I:  
absorption cross-sections at room temperature. Journal of Atmospheric  
Chemistry 15, 145–155, 1992.

Davenport, J.E. Determination of NO<sub>2</sub> photolysis parameters for stratospheric  
modelling, FAA Report No. FAA-EQ-7-14, 1978.

Dickerson, R. R., Kondragunta, S., Stenchikov, G., Civerolo, K. L., Doddridge, B. G.,  
Holben, N.: The impact of aerosols on solar ultraviolet radiation and  
photochemical smog, Science, 278, 827–830, 10.1126/science.278.5339.827,  
1997.

- Ehhalt, D. H., Rohrer, F.: Dependence of the OH concentration on solar UV, JOURNAL OF GEOPHYSICAL RESEARCH-ATMOSPHERES, 105, 3565-3571, 10.1029/1999JD901070, 2000.
- Eskes, H. J., Van Velthoven, P. F. J., Valks, P. J. M., Kelder, H. M. Assimilation of GOME total ozone satellite observations in a three-dimensional tracer transport model, Q.J.R.Meteorol.Soc. 129, 1663-1681, doi:10.1256/qj.02.14, 2003.
- Finlayson-Pitts, B. J., Pitts, J. N.: Chemistry of the Upper and Lower Atmosphere. Academic Press, New York, 2000.
- Flynn, J., Lefer, B., Rappenglück, B., Leuchner, M., Perna, R., Dibb, J., Ziemba, L., Anderson, C., Stutz, J., Brune, W., Ren, X. R.: Impact of clouds and aerosols on ozone production in Southeast Texas. ATMOSPHERIC ENVIRONMENT, 44, 4126–4133, 10.1016/j.atmosenv.2009.09.005, 2010.
- Fotiadi, A., Hatzianastassiou, N., Drakakis, E., Matsoukas, C., Pavlakis, K. G., Hatzidimitriou, D., Gerasopoulos, E., Mihalopoulos, N., Vardavas, I.: Aerosol physical and optical properties in the eastern Mediterranean Basin, Crete, from Aerosol Robotic Network data, ATMOSPHERIC CHEMISTRY AND PHYSICS, 6, 5399–5413, 10.5194/acp-6-5399-2006, 2006
- Gao W, Tie X X, Xu J M, Huang R J, Mao X Q, Zhou G Q, Luyu Chang. Long-term trend of O<sub>3</sub> in a mega City (Shanghai), China: Characteristics, causes, and interactions with precursors. SCIENCE OF THE TOTAL ENVIRONMENT, 603, 425–433, 10.1016/j.scitotenv.2017.06.099, 2017.
- Garland, R.; O. Schmid, A.; Nowak, P.; Achtert, A.; Wiedensohler, S.; Gunthe, N.; Takegawa, K.; Kita, Y.; Kondo, and M. Hu (2009), Aerosol optical properties observed during Campaign of Air Quality Research in Beijing 2006 (CAREBeijing-2006): Characteristic differences between the inflow and outflow of Beijing city air, JOURNAL OF GEOPHYSICAL RESEARCH-ATMOSPHERES, 114, D00G04, 10.1029/2008JD010780, 2009.
- Gerasopoulos, E., Kazadzis, S., Vrekoussis, M., Kouvarakis, G., Liakakou, E., Kouremeti, N., Giannadaki, D., Kanakidou, M., Bohn, B., Mihalopoulos, N.:

Factors affecting O<sub>3</sub> and NO<sub>2</sub> photolysis frequencies measured in the eastern Mediterranean during the five-year period 2002–2006, JOURNAL OF GEOPHYSICAL RESEARCH-ATMOSPHERES, 117, D22305, 10.1029/2012JD017622, 2012.

Goliff, W. S., Stockwell, W. R., Lawson, C. V.: The regional atmospheric chemistry mechanism, version 2, ATMOSPHERIC ENVIRONMENT, 68, 174–185, 10.1016/j.atmosenv.2012.11.038, 2013.

Guo, S., Hu M, Zamora, M. L., Peng, J. F., Shang, D. J., Zheng, J., Du, Z. F., Wu, Z. J., Shao, M., Zeng, L. M., Molina, M. J., Zhang, R. Y.: Elucidating severe urban haze formation in China, PROCEEDINGS OF THE NATIONAL ACADEMY OF SCIENCES OF THE UNITED STATES OF AMERICA, 111, 17373–17378, 10.1073/pnas.1419604111, 2014.

Han, T. T., Liu, X. G., Zhang, Y. H., Qu, Y., Gu, J. W., Ma, Q., Lu, K. D., Tian, H. Z., Chen, J., Zeng, L. M.: Characteristics of aerosol optical properties and their chemical apportionments during CAREBeijing 2006, AEROSOL AND AIR QUALITY RESEARCH, 14: 1431–1442, 10.4209/aaqr.2013.06.0203, 2014.

Han, T. T., Xu, W. Q., Chen, C., Liu, X. G., Wang, Q. Q., Li, J., Zhao, X. J., Du, W., Wang, Z. F., Sun, Y. L.: Chemical apportionment of aerosol optical properties during the Asia-Pacific Economic Cooperation summit in Beijing, China, JOURNAL OF GEOPHYSICAL RESEARCH-ATMOSPHERES, 120, 10.1002/2015JD023918, 2015b.

Han, T. T., Xu, W. Q., Li, J., Freedman, A., Zhao, J., Wang, Q. Q., Chen, C., Zhang, Y. J., Wang, Z. F., Fu, P. Q.: Aerosol optical properties measurements by a CAPS single scattering albedo monitor: Comparisons between summer and winter in Beijing, China, JOURNAL OF GEOPHYSICAL RESEARCH-ATMOSPHERES, 122, 2513–2526, 10.1002/2016JD025762, 2017.

Han, T., Liu, X., Zhang, Y., Qu, Y., Zeng, L., Hu, M., Zhu, T.: Role of secondary aerosols in haze formation in summer in the Megacity Beijing, JOURNAL OF ENVIRONMENTAL SCIENCES, 31, 51–60, 10.1016/j.jes.2014.08.026, 2015a.

Harker, A. B., Ho, W., and Ratto, J. J. Photodissociation quantum yields of NO<sub>2</sub> in the region 375 to 420 nm, Chem Phys. Lett. 50, 394-397, 1977.

He, S., Carmichael, G. R.: Sensitivity of photolysis rates and ozone production in the troposphere to aerosol properties, JOURNAL OF GEOPHYSICAL RESEARCH-ATMOSPHERES, 104, 26307–26324, 10.1029/1999JD900789, 1999.

Hendrick, F; Muller, JF; Clemer, K; Wang, P; De Maziere, M; Fayt, C; Gielen, C; Hermans, C; Ma, JZ; Pinardi, G; Stavrou, T; Vlemmix, T; Van Roozendaal, M., Four years of ground-based MAX-DOAS observations of HONO and NO<sub>2</sub> in the Beijing area. ATMOSPHERIC CHEMISTRY AND PHYSICS, 14(2), 765-781, 2014.

Hodzic, A., Madronich, S., Bohn, B., Massie, S., Menut, L., and Wiedinmyer, C.: Wildfire particulate matter in Europe during summer 2003: meso-scale modeling of smoke emissions, transport and radiative effects, ATMOSPHERIC CHEMISTRY AND PHYSICS, 7, 4043–4064, 10.5194/acp-7-4043-2007, 2007.

Hofzumahaus, A., Kraus, A., Muller, M.: Solar actinic flux spectroradiometry: A technique for measuring photolysis frequencies in the atmosphere, APPLIED OPTICS, 38, 4443–4460, 10.1364/AO.38.004443, 1999.

Hofzumahaus, A., Lefer, B. L., Monks, P. S., Hall, S. R., Kylling, A., Mayer, B., Shetter, R. E., Junkermann, W., Bais, A., Calvert, J. G., Cantrell, C. A., Madronich, S., Edwards, G. D., Kraus, A.: Photolysis frequency of O<sub>3</sub> to O(<sup>1</sup>D): Measurements and modeling during the International Photolysis Frequency Measurement and Modeling Intercomparison (IPMMI), JOURNAL OF GEOPHYSICAL RESEARCH-ATMOSPHERES, 109 (D8), D08S90, 10.1029/2003JD004333, 2004.

Jacobson, M, Z.: Studying the effects of aerosols on vertical photolysis rate coefficient and temperature profiles over an urban airshed, JOURNAL OF GEOPHYSICAL RESEARCH-ATMOSPHERES, 103, 10593–10604, 10.1029/98JD00287, 1998.

Jones, I. T. N. and Bayes, K.D. Photolysis of nitrogen dioxide, *J. Chem. Phys.* 59, 4836-4844, 1973.

Kazadzis, S., Bais, A. F., Balis, D., Zerefos, C. S., and Blumthaler, M. Retrieval of down-welling UV actinic flux density spectra from spectral measurements of global and direct solar UV irradiance, *J. Geophys. Res.*, 105, 4857-4864, 2000.

Kazadzis, S., Topaloglou, C., Bais, A. F., Blumthaler, M., Balis, D., Kazantzidis, A., Schallhart, B. Actinic flux and O<sup>1</sup>D photolysis frequencies retrieved from spectral measurements of irradiance at Thessaloniki, Greece, *ATMOSPHERIC CHEMISTRY AND PHYSICS*, 4, 2215-2226, DOI: 10.5194/acp-4-2215-2004, 2004.

Kazadzis, S., Amiridis, V., and Kouremeti, N. The Effect of Aerosol Absorption in Solar UV Radiation, *Advances in Meteorology, Climatology and Atmospheric Physics*, 1041-1047, 2012.

Krotkov, N., Bhartia, P. K., Herman, J., Slusser, J., Scott, G., Labow, G., Vasilkov, A. P., Eck, T. F., Dubovik, O., Holben, B. N. Aerosol ultraviolet absorption experiment (2000 to 2004), part 2: Absorption optical thickness, refractive index, and single scattering albedo, *OPTICAL ENGINEERING*, 44, 4, 041005. DOI: 10.1117/1.1886819, 2005.

Kylling, A., Webb, A. R., Bais, A. F., Blumthaler, M., Schmitt, R., Thiel, S., Kazantzidis, A., Kift, R., Misslebeck, M., Schallhart, B., Schreder, J., Topaloglou, C., Kazadzis, S., and Rimmer, J.: Actinic flux determination from measurements of irradiance, *J. Geophys. Res.*, 108 (D16), 4506-4515, 2003.

Lefer, B. L., Shetter, R. E., Hall, S. R.: Impact of clouds and aerosols on photolysis frequencies and photochemistry during TRACE-P: 1. Analysis using radiative transfer and photochemical box models, *JOURNAL OF GEOPHYSICAL RESEARCH-ATMOSPHERES*, 108, 8821-8835, 10.1029/2002JD003171, 2003.

Li C C, Mao J T, Liu Q H. Using MODIS to study the distribution and seasonal variation of aerosol optical thickness in eastern China. *Science Bulletin (China)*, 48: 2094-2100. 2003.

843 Li, J., Wang, Z. F., Wang, X., Yamaji, K., Takigawa, M., Kanaya, Y., Pochanart, P.,  
 844 Liu, Y., Irie, H., Hu, B., Tanimoto, H., Akimoto, H.: Impacts of aerosols on  
 845 summertime tropospheric photolysis frequencies and photochemistry over  
 846 Central Eastern China, *ATMOSPHERIC ENVIRONMENT*, 45: 1817-1829,  
 847 10.1016/j.atmosenv.2011.01.016, 2011.

848 Liao, H., Yung, Y. L., and Seinfeld, J. H.: Effects of aerosols on tropospheric  
 849 photolysis rates in clear and cloudy atmospheres, *JOURNAL OF*  
 850 *GEOPHYSICAL RESEARCH*, 104(D19), 23697–23707, 1999.

851 Liu, Q.Y., Ma, T. M., Olson, M. R., Liu, Y. J., Zhang, T. T., Wu, Y., Schauer, J. J.:  
 852 Temporal variations of black carbon during haze and non-haze days in Beijing,  
 853 *SCIENTIFIC REPORTS*, 6, 33331, 10.1038/srep33331, 2016.

854 Lou, S. J; Liao, H; Zhu, B. Impacts of aerosols on surface-layer ozone concentrations  
 855 in China through heterogeneous reactions and changes in photolysis rates.  
 856 *ATMOSPHERIC ENVIRONMENT*, 85:123-138,  
 857 0.1016/j.atmosenv.2013.12.004, 2014.

858 Lu, K. D., Rohrer, F., Holland, F., Fuchs, H., Bohn, B., Brauers, T., Chang, C. C.,  
 859 Häsel, R., Hu, M., Kita, K., Kondo, Y., Li, X., Lou, S. R., Nehr, S., Shao, M.,  
 860 Zeng, L. M., Wahner, A., Zhang, Y. H., Hofzumahaus, A.: Observation and  
 861 modelling of OH and HO<sub>2</sub> concentrations in the Pearl River Delta 2006: a  
 862 missing OH source in a VOC rich atmosphere, *ATMOSPHERIC CHEMISTRY*  
 863 *AND PHYSICS*, 12: 1541-1569, 10.5194/acp-12-1541-2012, 2012

864 Ma, X. Y., Wang, J. Y., Yu, F. Q., Jia, H. L., Hu, Y. N.: Can MODIS AOD be  
 865 employed to derive PM<sub>2.5</sub> in Beijing-Tianjin-Hebei over China?  
 866 *ATMOSPHERIC RESEARCH*, 181, 250-256, 10.1016/j.atmosres.2016.06.018,  
 867 2016.

868 Ma, Z. W., Hu, X. F., Huang, L., Bi, J., Liu, Y.: Estimating Ground-Level PM<sub>2.5</sub> in  
 869 China Using Satellite Remote Sensing. *Environ Sci Technol*, 48: 7436–7444.

Madronich, S, The Atmosphere and UV-B Radiation at Ground Level, Environmental  
 UV Photobiology, doi: 0.1007/978-1-4899-2406-3\_1. 1993,

Madronich, S., and S. Flocke, The role of solar radiation in atmospheric chemistry, in  
 Environmental Photochemistry, edited by P. Boule, pp. 1-26, Springer-Verlag,  
 New York, 1999.

Mailler, S., Menut, L., di Sarra, A. G., Becagli, S., Di Iorio, T., Bessagnet, B., Briant,  
 R., Formenti, P., Doussin, J. F., Gomez-Amo, J. L., Mallet, M., Rea, G., Siour, G.,  
 Sferlazzo, D. M., Traversi, R., Udisti, R., Turquety, S.: On the radiative impact of  
 aerosols on photolysis rates: comparison of simulations and observations in the  
 Lampedusa island during the ChArMEx/ADRIMED campaign, ATMOSPHERIC  
 CHEMISTRY AND PHYSICS, 16(3):1219-1244, 10.5194/acp-16-1219-2016,  
 10.5194/acp-16-1219-2016, 2016.

Matsumi, Y., Comes, F.J., Hancock, G., Hofzumahaus, A., Hynes, A.J., Kawasaki, M.,  
 Ravishankara, A.R., Quantum yields for production of O(<sup>1</sup>D) in the ultraviolet  
 photolysis of ozone: recommendation based on evaluation of laboratory data.  
 Journal of Geophysical Research 107 (D3), 4024. doi:10.1029/2001JD000510.  
 2002.

Malicet, J., Daumont, D., Charbonnier, J., Parisse, C., Chakir, A., Brion, J. Ozone UV  
 spectroscopy. II. Absorption cross-sections and temperature dependence. Journal  
 of Atmospheric Chemistry 21 (3), 263-273, 1995.

Peeters, J., Nguyen, T. L., Vereecken, L.: HOX radical regeneration in the oxidation of  
 isoprene. PHYSICAL CHEMISTRY CHEMICAL PHYSICS, 11: 5935-5939,  
 10.1039/b908511d, 2009.

Pere, J. C., Bessagnet, B., Pont, V., Mallet, M., Minvielle, F.: Influence of the aerosol  
 solar extinction on photochemistry during the 2010 Russian wildfires episode,  
 ATMOSPHERIC CHEMISTRY AND PHYSICS, 15, 10983-10998,  
 10.5194/acp-15-10983-2015, 2015.

Raga, G. B., Castro, T., Baumgardner, D.: The impact of megacity pollution on local  
 climate and implications for the regional environment: Mexico City,

899       ATMOSPHERIC ENVIRONMENT, 35, 1805-1811,  
900       10.1016/S1352-2310(00)00275-2, 2001.

901   Real, E. and Sartelet, K.: Modeling of photolysis rates over Europe: impact on  
902       chemical gaseous species and aerosols, ATMOSPHERIC CHEMISTRY AND  
903       PHYSICS, 11, 1711–1727, 10.5194/acp-11-1711-2011, 2011.

904   Rohrer, F; Lu, K. D; Hofzumahaus, A; Bohn, B ; Brauers, T ; Chang, C. C ; Fuchs, H;  
905       Haseler, R; Holland, F; Hu, M., Maximum efficiency in the  
906       hydroxyl-radical-based self-cleansing of the troposphere, Nature Geoscience. 7,  
907       559-563, 2014.

908   Shetter, R. E., Muller, M.: Photolysis frequency measurements using actinic flux  
909       spectroradiometry during PEM-Tropics Mission: Instrumentation description and  
910       some results, JOURNAL OF GEOPHYSICAL RESEARCH-ATMOSPHERES,  
911       104, 5647-5661, 10.1029/98JD01381, 1999.

912   Shetter, R. E.: Photolysis frequency of NO<sub>2</sub>: measurement and modeling during the  
913       International Photolysis Frequency Measurement and Modeling Intercomparison  
914       (IPMMI), JOURNAL OF GEOPHYSICAL RESEARCH-ATMOSPHERES, 108,  
915       8544, 10.1029/2002JD002932, 2003.

916   Stone, D; Whalley, L. K; Heard, D. E. Tropospheric OH and HO<sub>2</sub> radicals: field  
917       measurements and model comparisons, Chem. Soc. Rev, 41(19): 6348-6404,  
918       10.1039/c2cs35140d, 2012.

919   Tang, Y., Carmichael, G. R., Kurata, G., Uno, I., Weber, R. J., Song, C. H., Guttikunda,  
920       S. K., Woo, J. H., Streets, D. G., Wei, C., Clarke, A. D., Huebert, B., Anderson, T.  
921       L.: Impacts of dust on regional tropospheric chemistry during the ACE-Asia  
922       experiment: a model study with observations, JOURNAL OF GEOPHYSICAL  
923       RESEARCH-ATMOSPHERES, 109, D19S21, 10.1029/2003JD003806, 2004.

924   Tian, P., Wang, G. F., Zhang, R. J., Wu, Y. F., Yan, P.: Impacts of aerosol chemical  
925       compositions on optical properties in urban Beijing, China, PARTICULOLOGY,  
926       18, 155-164, 10.1016/j.partic.2014.03.014, 2015.

927   Tie, X. X., Madronich, S., Walters, S., Edwards, D. P., Ginoux, P., Mahowald, N.,



- Zhang, R. Y., Lou, C., Brasseur, G.: Assessment of the global impact of aerosols on tropospheric oxidants. JOURNAL OF GEOPHYSICAL RESEARCH-ATMOSPHERES, 110, D03204, 10.1029/2004JD005359, 2005.
- Topaloglou, C., Kazadzis, S., Bais, A.F., Blumthaler, M., Schallhart, B., Balis, D. NO<sub>2</sub> and HCHO photolysis frequencies from irradiance measurements in Thessaloniki, Greece. ATMOSPHERIC CHEMISTRY AND PHYSICS, 5, 1645-1653, DOI: 10.5194/acp-5-1645-2005, 2005.
- Trebs, I., Bohn, B., Ammann, C., Rummel, U., Blumthaler, M., Konigstedt, R., Meixner, F. X., Fan, S., Andreae, M. O. Relationship between the NO<sub>2</sub> photolysis frequency and the solar global irradiance, ATMOSPHERIC MEASUREMENT TECHNIQUES, 2, 725-739, DOI: 10.5194/amt-2-725-2009, 2009.
- van Donkelaar, A., Martin, R. V., Brauer, M., Kahn, R., Levy, R., Verduzco, C., and Villeneuve, P. J.: Global Estimates of Ambient Fine Particulate Matter Concentrations from Satellite-Based Aerosol Optical Depth: Development and Application. Environmental Health Perspectives, 118, 847-855, 10.1289/ehp.0901623, 2010.
- Verstraeten, W. W., Neu, J. L., Williams, J. E., Bowman, K. W., Worden, J. R., Boersma, K. F.: Rapid increases in tropospheric ozone production and export from China. NATURE GEOSCIENCE, 8, 690-695, 10.1038/NGEO2493, 2015.
- Volkamer R, Sheehy P, Molina L T, Molina M J.: Oxidative capacity of the Mexico City atmosphere – Part 1: A radical source perspective, ATMOSPHERIC CHEMISTRY AND PHYSICS, 10, 6969–6991, 10.5194/acp-10-6969-2010, 2010.
- Wang, B., Shao, M., Lu, S. H., Yuan, B., Zhao, Y., Wang, M., Zhang, S. Q., Wu, D.: Variation of ambient non-methane hydrocarbons in Beijing city in summer 2008, ATMOSPHERIC CHEMISTRY AND PHYSICS, 10, 5911–5923, 10.5194/acp-10-5911-2010, 2010.
- Wang, Q., Sun, Y., Jiang, Q., Du, W., Sun, C., Fu, P., Wang, Z.: Chemical

composition of aerosol particles and light extinction apportionment before and during the heating season in Beijing, China. JOURNAL OF GEOPHYSICAL RESEARCH-ATMOSPHERES, 120: 12,708-12,722, 10.1002/2015JD023871, 2015.

Xin, J. Y; Gong, C. S; Liu, Z. R; Cong, Z. Y; Gao, W. K; Song, T; Pan, Y. P; Sun, Y; Ji, D. S; Wang, L. L; Tang, G. Q; Wang, Y. S.: The observation-based relationships between PM<sub>2.5</sub> and AOD over China, JOURNAL OF GEOPHYSICAL RESEARCH-ATMOSPHERES, 121, 10701-10716, 10.1002/2015JD024655, 2016.

Xu, J., Ma, J. Z., Zhang, X. L., Xu, X. B., Xu, X. F., Lin, W. L., Wang, Y., Meng, W., and Ma, Z. Q.: Measurements of ozone and its precursors in Beijing during summertime: impact of urban plumes on ozone pollution in downwind rural areas, ATMOSPHERIC CHEMISTRY AND PHYSICS, 11, 12241–12252, 10.5194/acp-11-12241-2011, 2011.

Zhang, J. P., Zhu, T., Zhang, Q. H., Li, C. C., Shu, H. L., Ying, Y., Dai, Z. P., Wang, X., Liu, X. Y., Liang, A. M., Shen, H. X., and Yi, B. Q.: The impact of circulation patterns on regional transport pathways and air quality over Beijing and its surroundings, ATMOSPHERIC CHEMISTRY AND PHYSICS, 12, 5031–5053, 10.5194/acp-12-5031-2012, 2012.

Zhang, L.; Shao, J.; Lu, X.; Zhao, Y.; Hu, Y.; Henze, D. K.; Liao, H.; Gong, S.; Zhang, Q.: Sources and Processes Affecting Fine Particulate Matter Pollution over North China: An Adjoint Analysis of the Beijing APEC Period. ENVIRONMENTAL SCIENCE & TECHNOLOGY, 50(16), 8731-8740, 10.1021/acs.est.6b03010, 2016.

Zhang, Q., Yuan, B., Shao, M., Wang, X., Lu, S., Lu, K., Wang, M., Chen, L., Chang, C. C., Liu, S. C.: Variations of ground-level O<sub>3</sub> and its precursors in Beijing in summertime between 2005 and 2011, ATMOSPHERIC CHEMISTRY AND PHYSICS, 14, 6089-6101, 10.5194/acp-14-6089-2014, 2014.

Zhang, R., Jing, J., Tao, J., Hsu, S. C., Wang, G., Cao, J., Lee, C. S. L., Zhu, L., Chen,

Z., Zhao, Y., Shen, Z.: Chemical characterization and source apportionment of  
PM<sub>2.5</sub> in Beijing: seasonal perspective, *ATMOSPHERIC CHEMISTRY AND  
PHYSICS*, 13, 7053-7074, 10.5194/acp-13-7053-2013, 2013.  
Zheng, C. W., Zhao, C. F., Zhu, Y. N., Wang, Y., Shi, X. Q., Wu, X. L., Chen, T. M.,  
Wu, F., Qiu, Y. M.: Analysis of influential factors for the relationship between  
PM<sub>2.5</sub> and AOD in Beijing, *ATMOSPHERIC CHEMISTRY AND PHYSICS*, 17,  
13473-13489, 10.5194/acp-17-13473-2017, 2017.

Table 21. O<sub>3</sub> column concentration, temperature, relative humidity, daytime clear-sky fraction and respective standard deviation for different seasons.

| Season | O <sub>3</sub> column (Du) | Temperature (°C) | Relative humidity (%) | <u>Clear-sky fraction(%)</u> |
|--------|----------------------------|------------------|-----------------------|------------------------------|
| Spring | 355±37                     | 16±7.8           | 33±18                 | <u>41</u>                    |
| Summer | 310±24                     | 28±4.2           | 57±18                 | <u>36</u>                    |
| Autumn | 304±23                     | 16±7.4           | 46±21                 | <u>42</u>                    |
| Winter | 347±28                     | 0.53±4.2         | 30±18                 | <u>41</u>                    |

Table 42. Instruments deployed in the field campaign undertaken in August 2012 and used for data analysis.

| Parameters                                  | Measurement technique  | Time resolution | Detection limit | Accuracy |
|---------------------------------------------|------------------------|-----------------|-----------------|----------|
| j(O <sup>1</sup> D) and j(NO <sub>2</sub> ) | Spectroradiometer      | 10 s            | /               | ± 10%    |
| O <sub>3</sub>                              | UV photometry          | 60 s            | 0.5 ppbv        | ± 5%     |
| NO                                          | Chemiluminescence      | 60 s            | 60 pptv         | ± 20%    |
| NO <sub>2</sub>                             | Chemiluminescence      | 60 s            | 300 pptv        | ± 20%    |
| CO                                          | IR photometry          | 60 s            | 4 ppb           | ± 5%     |
| SO <sub>2</sub>                             | Pulsed UV fluorescence | 60 s            | 0.1 ppbv        | ± 5%     |
| HCHO                                        | Hantzsch fluorimetry   | 60 s            | 25 pptv         | ± 5%     |
| VOCs                                        | GC-FID/MS              | 1 h             | 20-300 pptv     | ± 15~20% |

Table 3. Slope, intercept and the square of correlation coefficient ( $r^2$ ) of linear fits of correlation between  $j(\text{O}^1\text{D})$  and AOD for each ozone column class at AOD smaller than 0.7.

| O <sub>3</sub> column<br>(DU) | SZA=30°                                      |                                                  |       | SZA=60°                                      |                                                  |       |
|-------------------------------|----------------------------------------------|--------------------------------------------------|-------|----------------------------------------------|--------------------------------------------------|-------|
|                               | Slope<br>(10 <sup>-6</sup> s <sup>-1</sup> ) | Intercept<br>(10 <sup>-6</sup> s <sup>-1</sup> ) | $r^2$ | Slope<br>(10 <sup>-6</sup> s <sup>-1</sup> ) | Intercept<br>(10 <sup>-6</sup> s <sup>-1</sup> ) | $r^2$ |
| 300-330                       | -6.2±1.5                                     | 26±1                                             | 0.34  | -4.2±0.4                                     | 7.7±0.3                                          | 0.41  |
| 330-360                       | -6.5±1.4                                     | 23±1                                             | 0.40  | -5.0±0.3                                     | 7.1±0.2                                          | 0.52  |
| 360-390                       | -9.5±1.6                                     | 21±1                                             | 0.52  | -6.9±0.6                                     | 7.6±0.3                                          | 0.66  |

1074  
1075  
1076  
1077  
1078  
1079  
1080  
1081  
1082  
1083  
  
1084  
1085  
1086  
1087  
1088  
1089  
1090  
1091  
1092  
1093  
1094  
1095

Table 4. Slope, intercept and the square of correlation coefficient ( $r^2$ ) of linear fits of correlation between  $j(\text{NO}_2)$  and AOD for each ozone column class at AOD smaller than 0.7.

| cos(SZA) | Slope ( $10^{-3} \text{ s}^{-1}$ ) | Intercept ( $10^{-3} \text{ s}^{-1}$ ) | $r^2$ |
|----------|------------------------------------|----------------------------------------|-------|
| 0-0.2    | -1.3±0.1                           | 1.5±0.0                                | 0.52  |
| 0.2-0.4  | -2.4±0.1                           | 3.4±0.0                                | 0.41  |
| 0.4-0.6  | -3.2±0.1                           | 5.5±0.0                                | 0.49  |
| 0.6-0.8  | -2.1±0.1                           | 7.2±0.1                                | 0.38  |
| 0.8-1.0  | -1.8±0.1                           | 8.1±0.1                                | 0.26  |

1096  
1097  
1098  
1099  
1100  
1101  
1102  
1103

1104 Table 5. The fitting parameters  $a_1$ - $a_6$  and determination coefficients of E5 for  $j(\text{NO}_2)$ .

| $a_1$            | $a_2$           | $a_3$        | $a_4$           | $a_5$           | $a_6$          | $r^2$ |
|------------------|-----------------|--------------|-----------------|-----------------|----------------|-------|
| $\times 10^{-3}$ |                 |              |                 |                 |                |       |
| $-0.46 \pm 0.05$ | $-2.0 \pm 0.03$ | $13 \pm 0.2$ | $0.22 \pm 0.01$ | $0.32 \pm 0.05$ | $-4.0 \pm 0.1$ | 0.96  |

1105  
1106  
1107  
1108

1109 Table 6. The fitting parameters  $a_1$ - $a_6$  and determination coefficients of E5 for  $j(\text{O}^1\text{D})$  at ozone column range = 300-330 DU.

1110 at ozone column range = 300-330 DU.

| $a_1$            | $a_2$           | $a_3$          | $a_4$           | $a_5$          | $a_6$      | $r^2$ |
|------------------|-----------------|----------------|-----------------|----------------|------------|-------|
| $\times 10^{-6}$ |                 |                |                 |                |            |       |
| $1.1 \pm 0.3$    | $0.58 \pm 0.17$ | $-8.7 \pm 0.9$ | $0.63 \pm 0.05$ | $-7.5 \pm 0.3$ | $43 \pm 1$ | 0.96  |

1111  
1112  
1113  
1114



1115

1116

1117

1118

1119

1120

1121 Table 7. Mean and standard deviation of observed data during daytime (6:00–18:00)

1122 for A day and B day.

| Observed data                              | A day: August 21, 2012                      | B day: August 26, 2012                      |
|--------------------------------------------|---------------------------------------------|---------------------------------------------|
| AOD                                        | $0.21 \pm 0.05$                             | $3.2 \pm 0.4$                               |
| PM <sub>2.5</sub> ( $\mu\text{g m}^{-3}$ ) | $22 \pm 9$                                  | $125 \pm 16$                                |
| O <sub>3</sub> column (Du)                 | $302 \pm 3$                                 | $301 \pm 3$                                 |
| Temperature(°C)                            | $28 \pm 3$                                  | $28 \pm 3$                                  |
| Relative humidity (%)                      | $48 \pm 10$                                 | $55 \pm 12$                                 |
| j(O <sup>1</sup> D)(s <sup>-1</sup> )      | $1.6 \times 10^{-5} \pm 1.2 \times 10^{-5}$ | $6.9 \times 10^{-6} \pm 5.2 \times 10^{-6}$ |
| j(NO <sub>2</sub> )(s <sup>-1</sup> )      | $5.4 \times 10^{-3} \pm 2.9 \times 10^{-3}$ | $2.9 \times 10^{-3} \pm 1.7 \times 10^{-3}$ |
| O <sub>3</sub> (ppb)                       | $40 \pm 17$                                 | $87 \pm 53$                                 |
| NO <sub>2</sub> (ppb)                      | $11 \pm 5$                                  | $25 \pm 10$                                 |
| CO (ppm)                                   | $0.24 \pm 0.05$                             | $0.85 \pm 0.14$                             |
| VOC reactivity (s <sup>-1</sup> )          | $3.0 \pm 0.7$                               | $6.4 \pm 1.7$                               |
| HCHO (ppb)                                 | $2.7 \pm 1.1$                               | $7.4 \pm 1.9$                               |

1123

1124

1125

1126

1127

1128

1129

1130

1131 Table 8. Monthly mean and standard deviation of observed data during daytime

1132 (6:00–18:00) under the condition of AOD less than 1 and larger than 1 in August 2012

| Observed data                              | AOD<1                                       | AOD>1                                       |
|--------------------------------------------|---------------------------------------------|---------------------------------------------|
| AOD                                        | $0.43 \pm 0.24$                             | $2.0 \pm 0.8$                               |
| PM <sub>2.5</sub> ( $\mu\text{g m}^{-3}$ ) | $26 \pm 12$                                 | $77 \pm 47$                                 |
| O <sub>3</sub> column (Du)                 | $303 \pm 4$                                 | $302 \pm 5$                                 |
| Temperature( $^{\circ}\text{C}$ )          | $30 \pm 4$                                  | $29 \pm 4$                                  |
| Relative humidity (%)                      | $42 \pm 16$                                 | $57 \pm 13$                                 |
| j(O <sup>1</sup> D)(s <sup>-1</sup> )      | $1.6 \times 10^{-5} \pm 1.1 \times 10^{-5}$ | $1.0 \times 10^{-5} \pm 0.7 \times 10^{-5}$ |
| j(NO <sub>2</sub> )(s <sup>-1</sup> )      | $5.6 \times 10^{-3} \pm 2.4 \times 10^{-3}$ | $3.8 \times 10^{-3} \pm 1.7 \times 10^{-3}$ |
| O <sub>3</sub> (ppb)                       | $52 \pm 34$                                 | $68 \pm 46$                                 |
| NO <sub>2</sub> (ppb)                      | $16 \pm 7.8$                                | $24 \pm 9$                                  |
| CO (ppm)                                   | $0.47 \pm 0.20$                             | $0.95 \pm 0.47$                             |
| VOC reactivity (s <sup>-1</sup> )          | $4.3 \pm 1.7$                               | $6.2 \pm 2.2$                               |
| HCHO (ppb)                                 | $4.0 \pm 1.4$                               | $6.5 \pm 1.9$                               |

1133

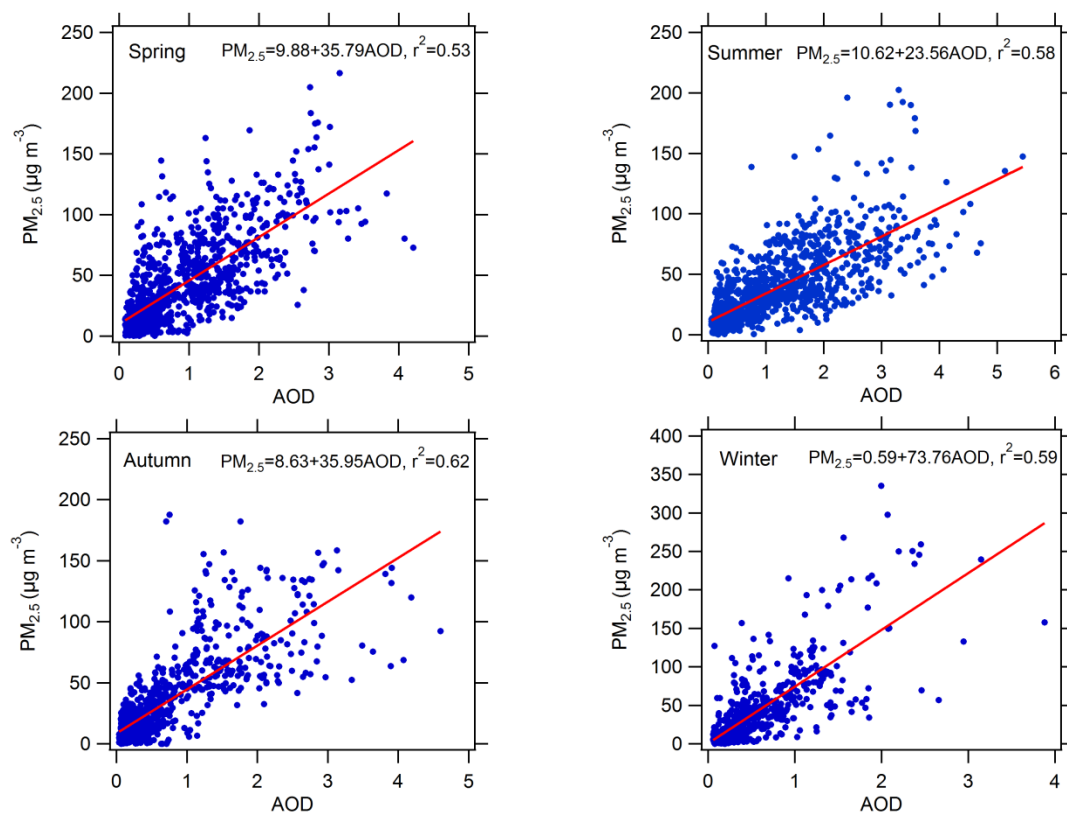

Figure 1. Scatter plots between AOD at 380nm and PM<sub>2.5</sub> in four different seasons. The slope, intercept and determination coefficient ( $r^2$ ) were calculated.

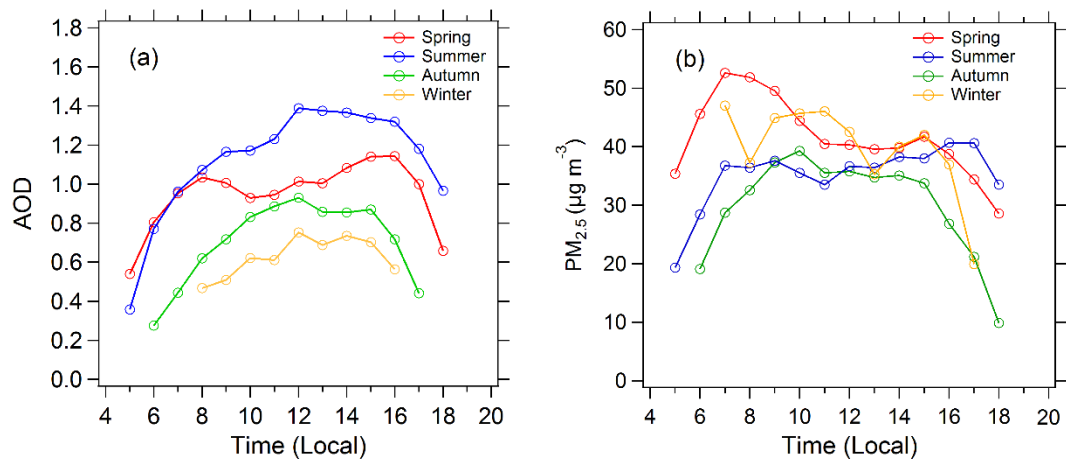

Figure 2. Diurnal cycles of (a) AOD and (b) PM<sub>2.5</sub> in the four seasons.

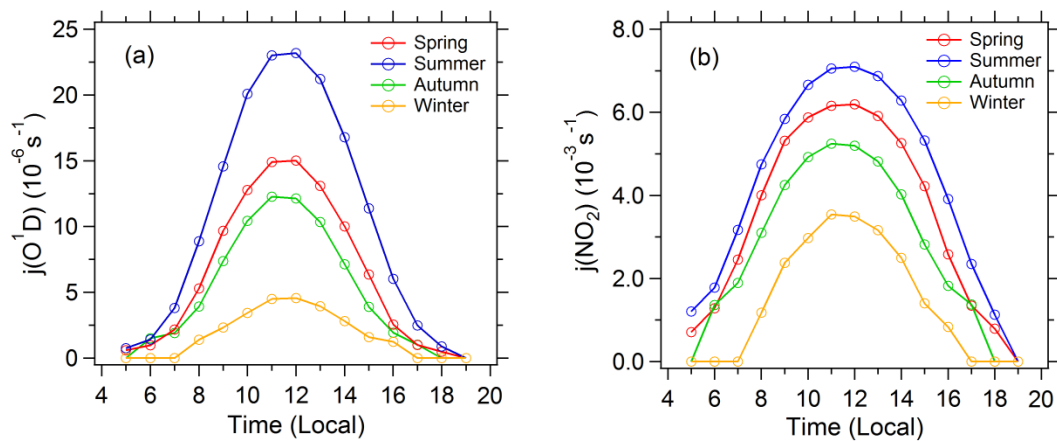

Figure 3. Diurnal cycles of (a)  $j(\text{O}^1\text{D})$  and (b)  $j(\text{NO}_2)$  in the four seasons under cloudless conditions.

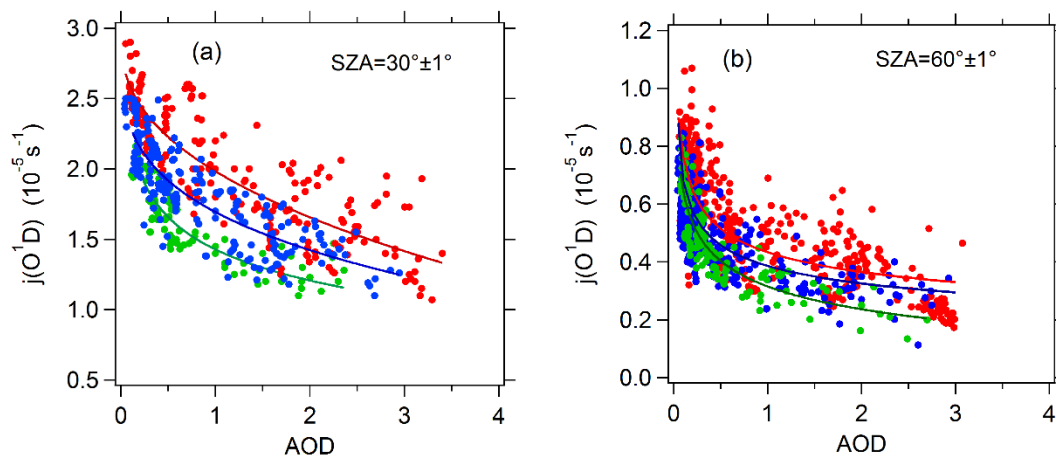

Figure 4. Dependence of  $j(\text{O}^1\text{D})$  on AOD (380nm) at SZA of (a)  $30^\circ$  and (b)  $60^\circ$  and at different classes of ozone column concentration: 300-330 DU (red), 330-360 DU (blue), and 360-390 DU (green). The full lines are fitted by exponential function.

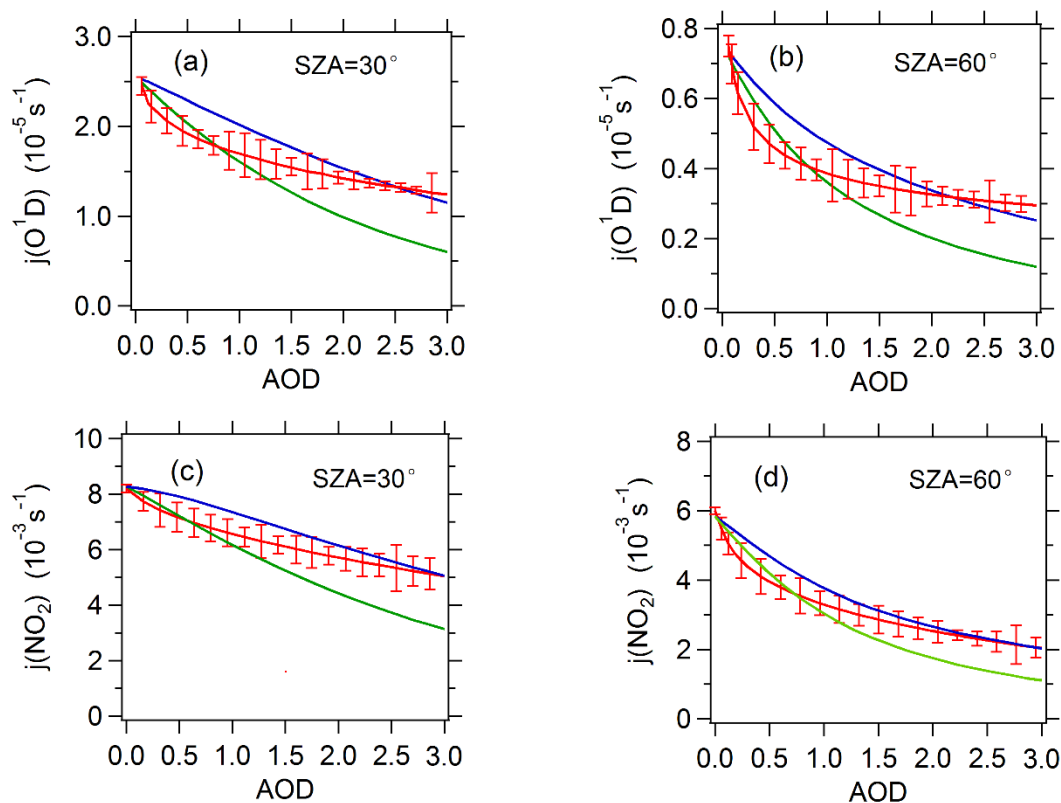

Figure 5. The relationship between observed or TUV-simulated photolysis frequencies and AOD (380nm) at SZA of 30° and 60°. The red line represents observed average photolysis frequencies; the blue line and green line represents TUV-simulated photolysis frequencies at SSA of 0.95 and 0.85 respectively.

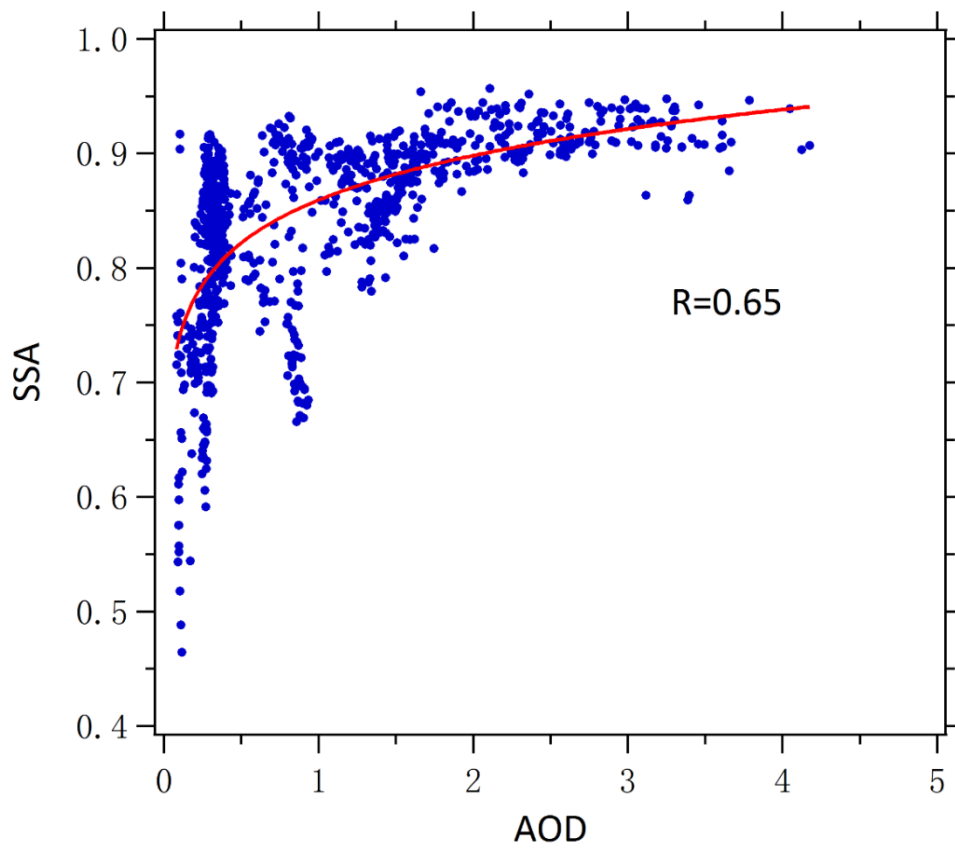

Figure 6. Correlation between SSA and AOD (380nm) observed in August 2012.



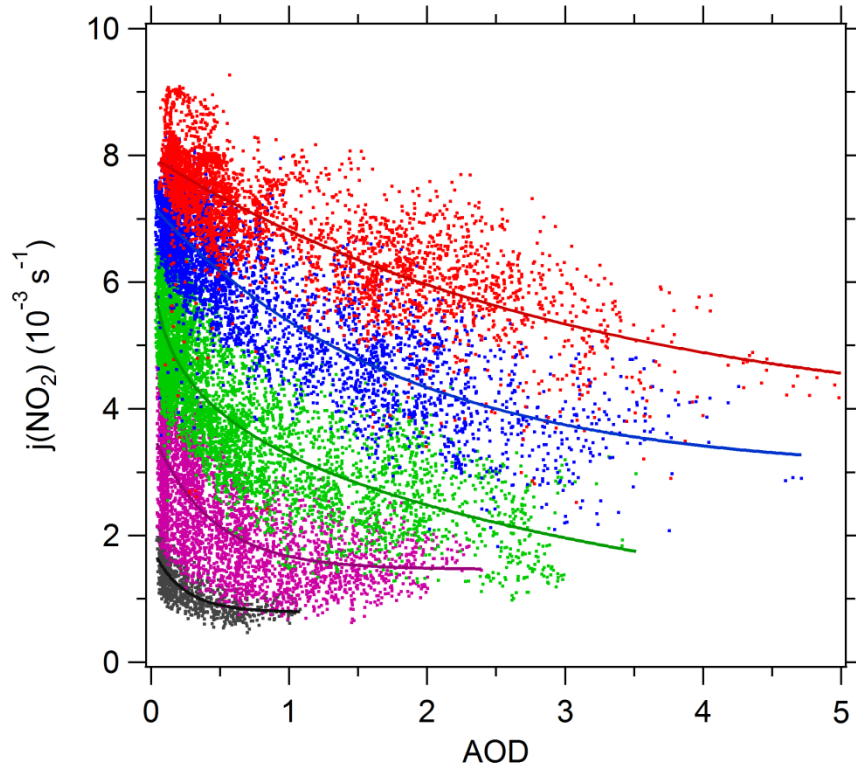

Figure 7. Dependence of  $j(\text{NO}_2)$  on AOD (380nm) at different SZA classes. The classes of  $\cos(\text{SZA})$  are 0–0.2 (black), 0.2–0.4 (purple), 0.4–0.6 (green), 0.6–0.8 (blue), and 0.8–1 (red). The full lines are fitted by exponential function.

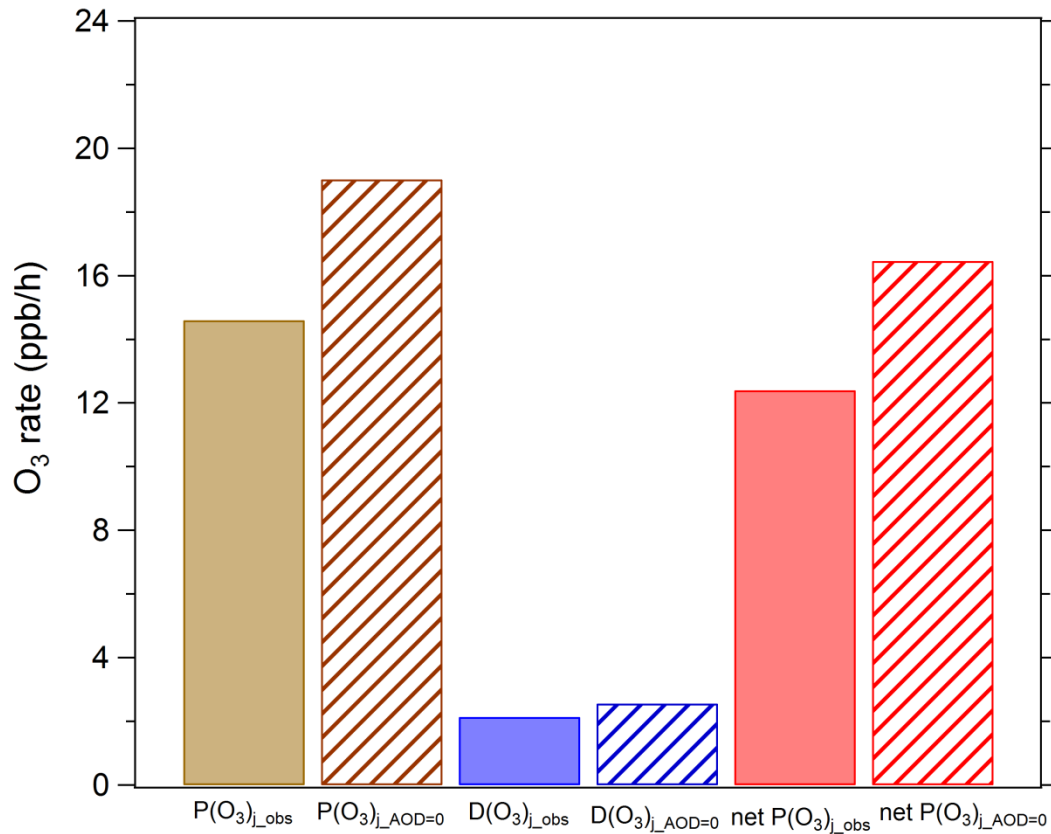

Figure 8. Average-Mean daytime ozone production and loss terms in August 2012.

$P(O_3)_{j\_obs}$ ,  $D(O_3)_{j\_obs}$  and  $net\ P(O_3)_{j\_obs}$  represents ozone production rate, ozone loss rate, and net ozone production rate under observed photolysis frequencies;  $P(O_3)_{j\_AOD=0}$ ,  $D(O_3)_{j\_AOD=0}$  and  $net\ P(O_3)_{j\_AOD=0}$  represents ozone production rate, ozone loss rate, and net ozone production rate under calculated photolysis frequencies when AOD is equal to 0.

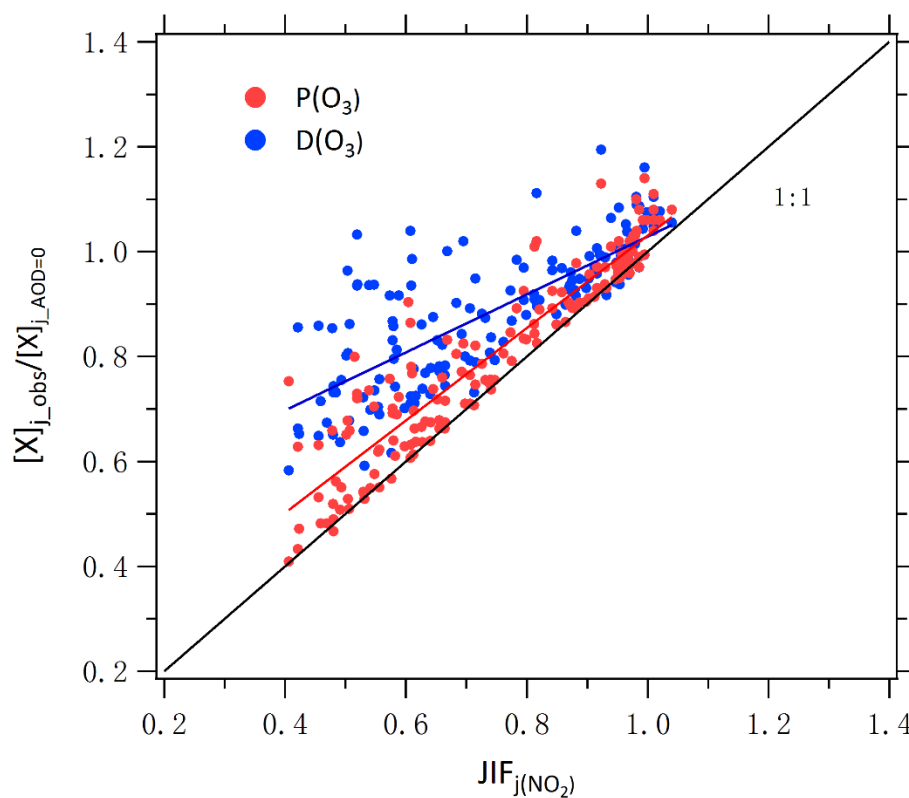

Figure 9. Correlation between  $P(O_3)_{j\_obs}/P(O_3)_{j\_AOD=0}$  (or  $D(O_3)_{j\_obs}/D(O_3)_{j\_AOD=0}$ ) and JIF of  $j(NO_2)$ . Single data points represent daytime hourly mean values.

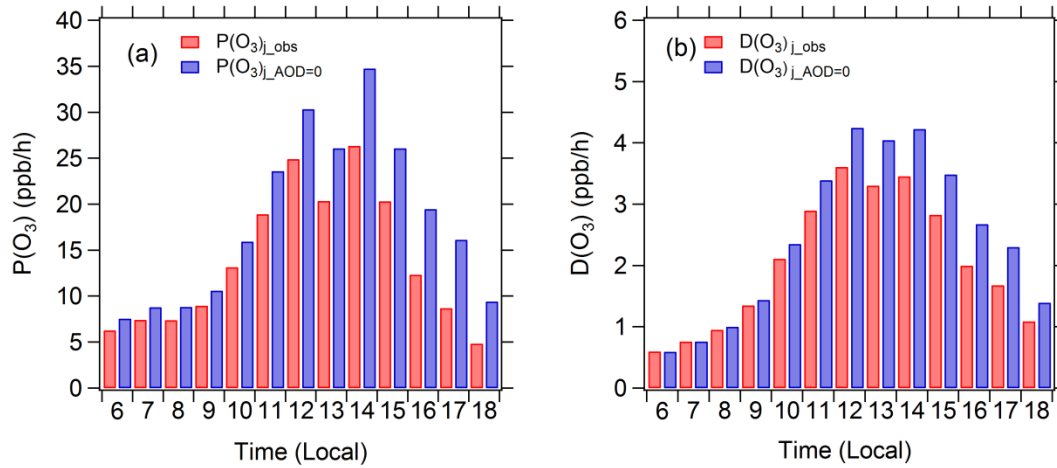

Figure 10. Diurnal profiles of mean  $P(O_3)_{j\_obs}$ ,  $P(O_3)_{j\_AOD=0}$ ,  $D(O_3)_{j\_obs}$ , and  $D(O_3)_{j\_AOD=0}$  in August 2012 under clear-sky conditions.

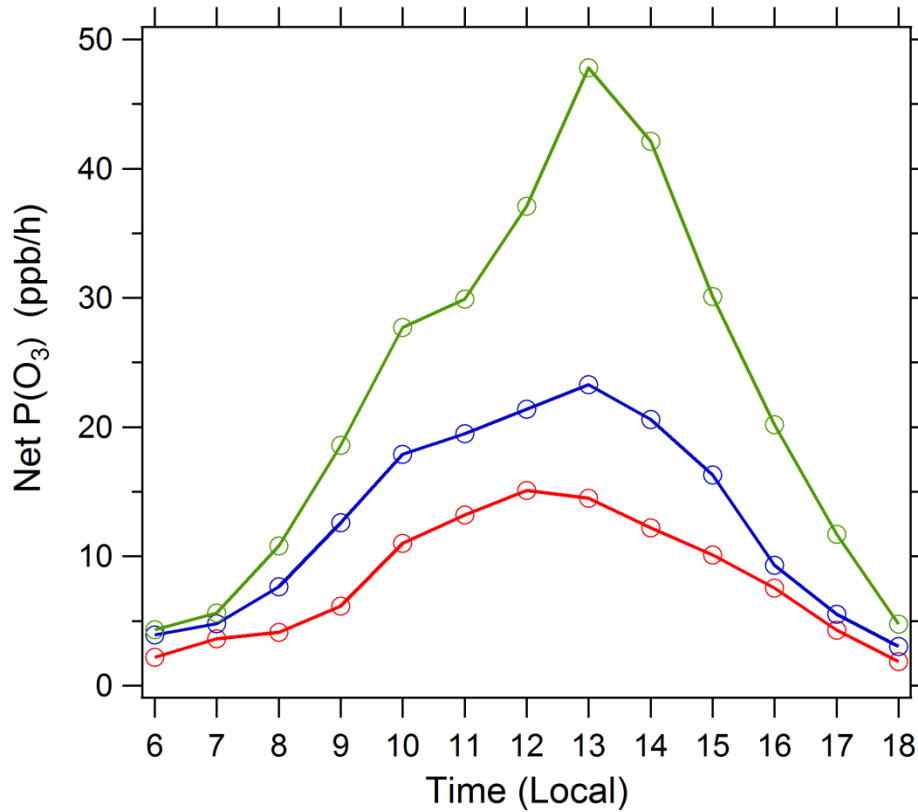

Figure 11. Diurnal profile of net P(O<sub>3</sub>) simulated by the box model. Three cases are displayed: (1) A day (red circles): August 21, 2012 with low AOD level and high photolysis frequencies; (2) B day (blue circles): August 26, 2012 with high AOD level and low photolysis frequencies; and (3) the photolysis frequencies of B day adjusted to the level of A day with other conditions unchanged (green circles). The specific conditions of A day and B day are listed in Table 7.

Supporting information

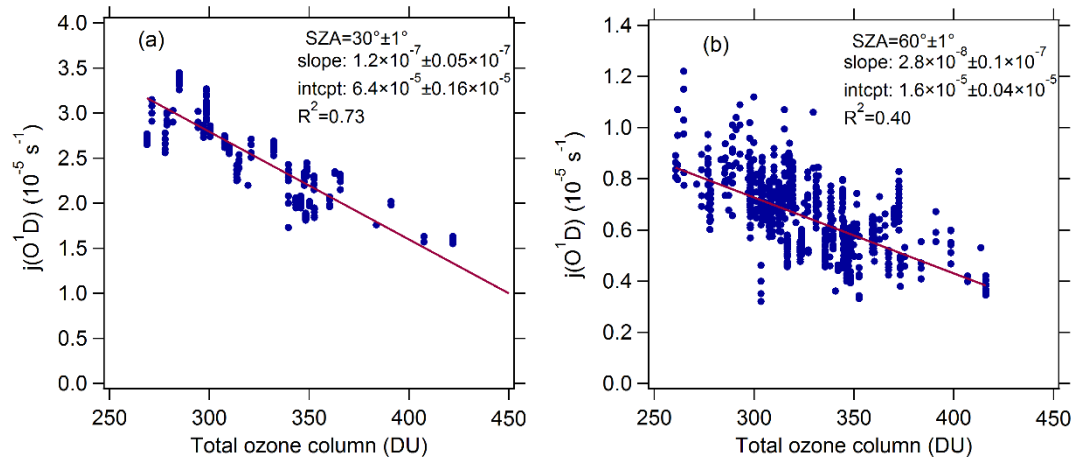

Figure S1. Dependence of  $j(\text{O}^1\text{D})$  on AOD (380nm) at low AOD level ( $\text{AOD} < 0.3$ ) and SZA of (a)  $30^\circ \pm 1^\circ$  and (b)  $60^\circ \pm 1^\circ$ , respectively.

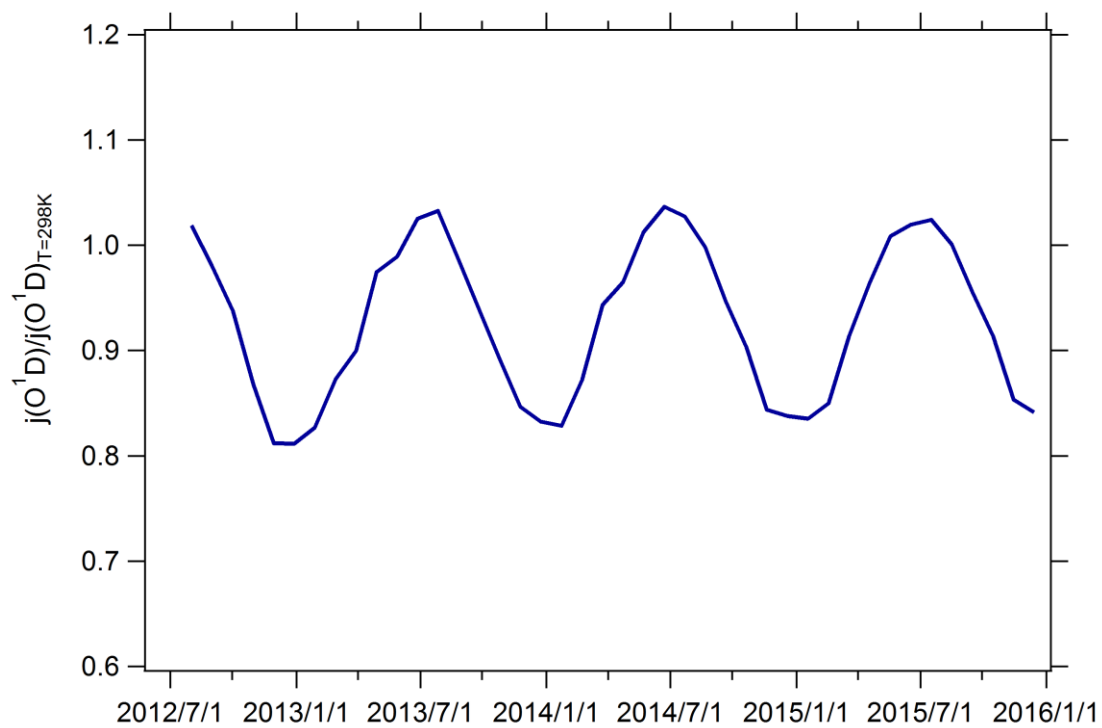

Figure S2. The time series of the monthly mean ratio of  $j(O^1D)$  to  $j(O^1D)_{T=298K}$  ( $j(O^1D)/j(O^1D)_{T=298K}$ ) from August 2012 to December 2016.
